# Supplementary material
Source: MDPI journal article supplement (https://www.mdpi.com/2304-6740/5/2/22)
Supplement: s1 [file s1]

# Supporting Information

## Insights into molecular Beryllium-Silicon bonds

*Dominik Naglav*<sup>1</sup>, *Briac Tobey*<sup>1</sup>, *Kevin Dzialkowski*<sup>1</sup>, *Georg Jansen*<sup>1</sup>, *Christoph Wölper*<sup>1</sup> and *Stephan Schulz*<sup>1,\*</sup>

<sup>1</sup> *Faculty of Chemistry and Center for NanoIntegration (CENIDE), University of Duisburg-Essen; Essen, Germany.*

\* *Correspondence: stephan.schulz@uni-due.de; Tel.: +49-201-183-4635*

### Content

**Fig. S1 – S4:** <sup>1</sup>H, <sup>9</sup>Be, <sup>13</sup>C and <sup>29</sup>Si-NMR spectrum of **[2a]** in thf-*d*<sub>8</sub>.

**Fig. S5 – S8:** <sup>1</sup>H, <sup>9</sup>Be, <sup>13</sup>C and <sup>29</sup>Si-NMR spectrum of **[4a]** in thf-*d*<sub>8</sub>.

**Table S1-S5.** Crystallographic details of **2a – 4a**.

**Fig. S9 – S12:** ELF plots of **1b – 4b**.

**Fig. S13 – S16:** LOL plots of **1b – 4b**.

**Fig. S17 – S20:** Gas phase structures of **1b – 4b**.

**Fig. S21 – S24:** Gas phase structures of **1c – 4c**.

**Table S6.** Computational details of **1b – 4b**.

**Fig. S1.**  $^1\text{H}$  NMR spectrum of 2a in  $\text{thf-}d_8$ .

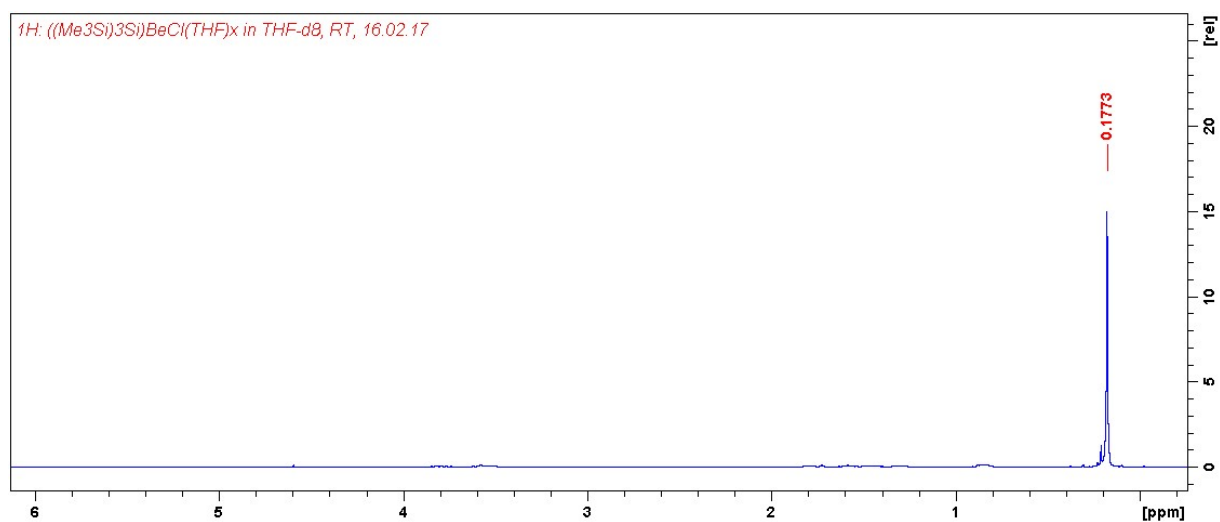

**Fig. S2.**  $^9\text{Be}$  NMR spectrum of 2a in  $\text{thf-}d_8$ .

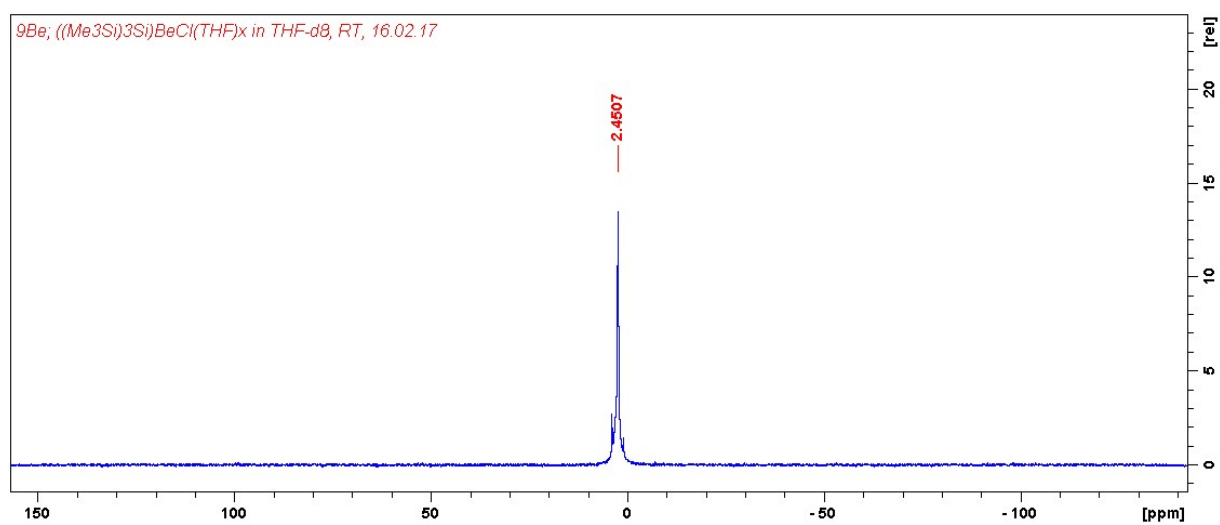

**Fig. S3.**  $^{13}\text{C}$  NMR spectrum of 2a in  $\text{thf-d}_8$ .

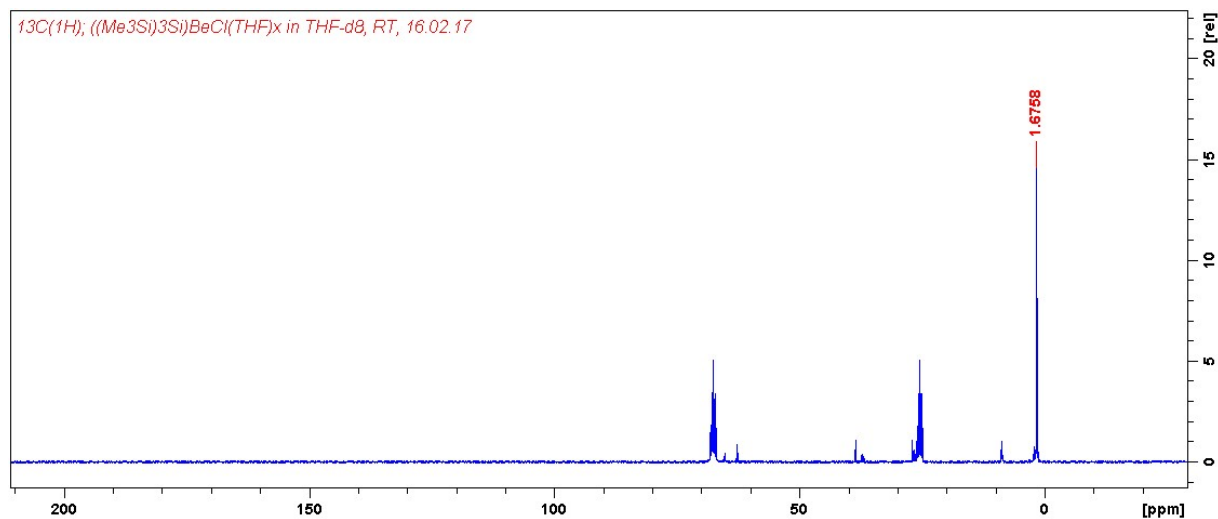

**Fig. S4.**  $^{29}\text{Si}$  NMR spectrum of 2a in  $\text{thf-d}_8$ .

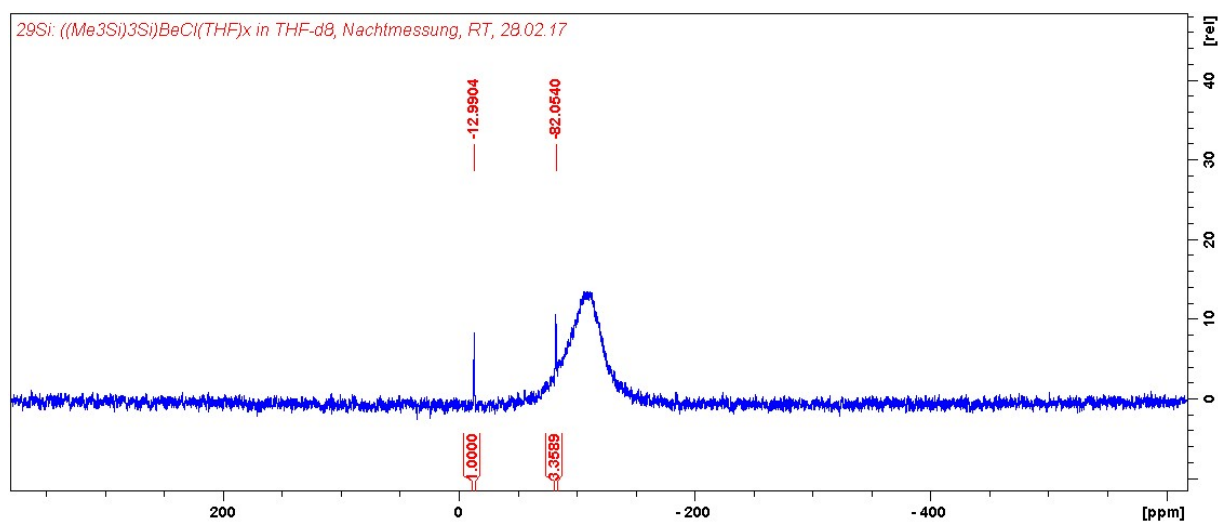

**Fig. S5.**  $^1\text{H}$  NMR spectrum of 4a in  $\text{thf-}d_8$ .

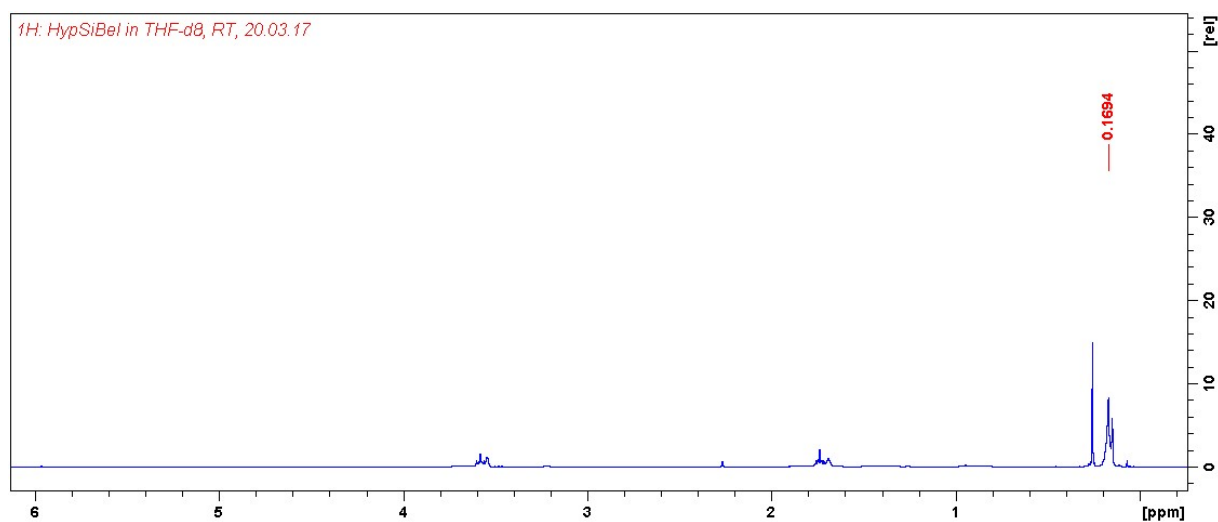

**Fig. S6.**  $^9\text{Be}$  NMR spectrum of 4a in  $\text{thf-}d_8$ .

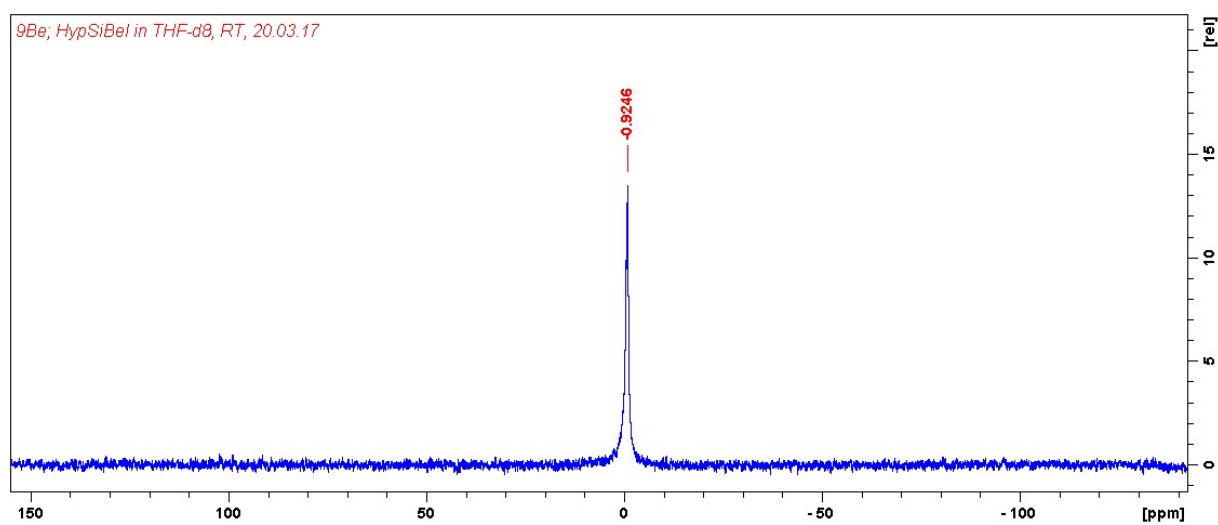

**Fig. S7.**  $^{13}\text{C}$  NMR spectrum of 4a in  $\text{thf-}d_8$ .

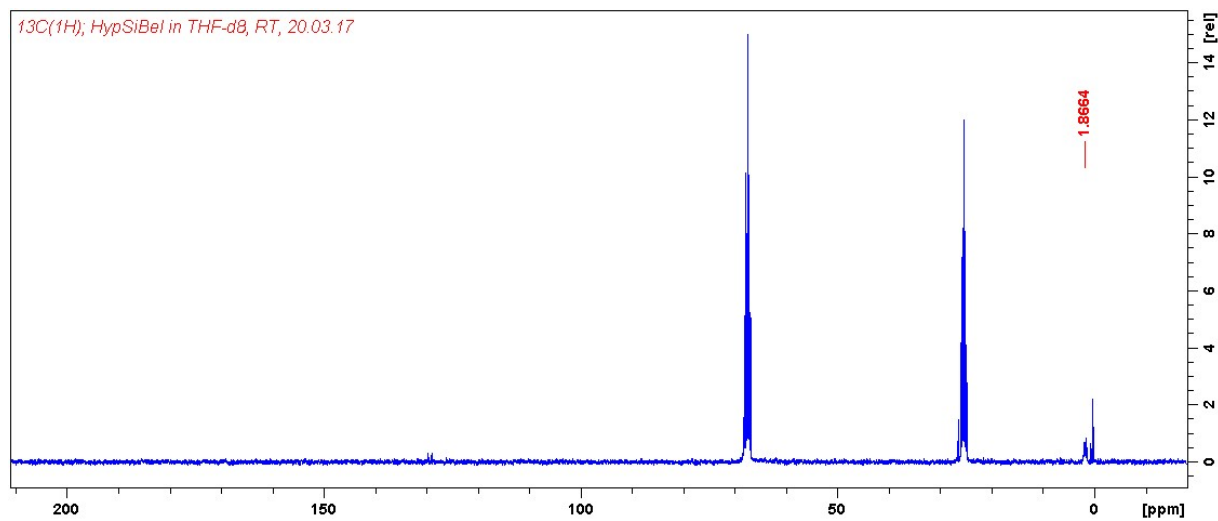

**Fig. S8.**  $^{29}\text{Si}$  NMR spectrum of 4a in  $\text{thf-}d_8$ .

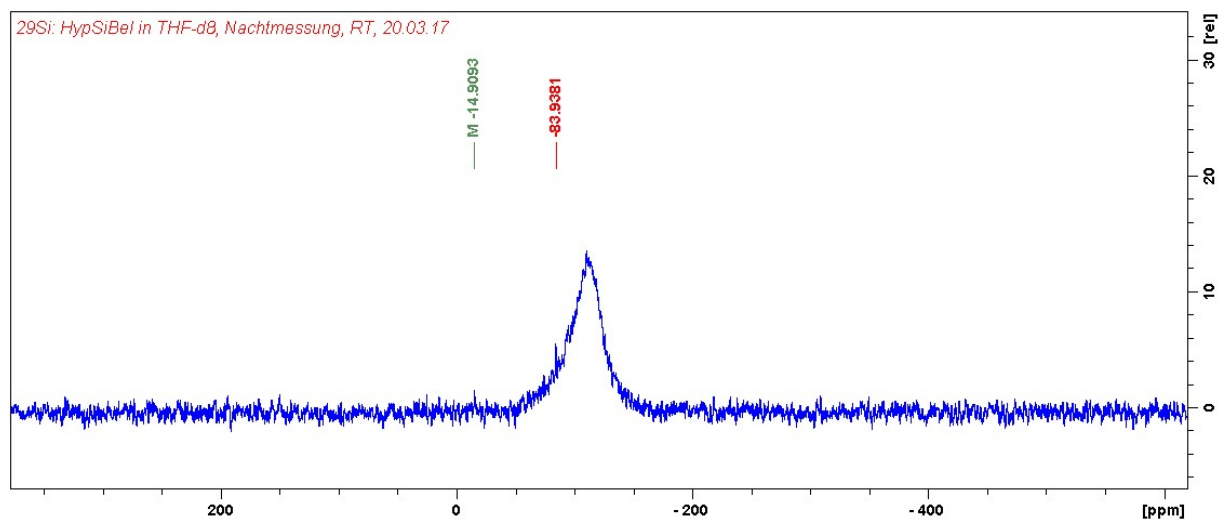

**Table S1. Crystallographic data of 2a**

|                                                            |                                                                                                |
|------------------------------------------------------------|------------------------------------------------------------------------------------------------|
| Empirical formula                                          | C <sub>26</sub> H <sub>70</sub> Be <sub>2</sub> Cl <sub>2</sub> O <sub>2</sub> Si <sub>8</sub> |
| <i>M</i>                                                   | 728.46                                                                                         |
| Crystal size [mm]                                          | 0.07 × 0.05 × 0.05                                                                             |
| <i>T</i> [K]                                               | 100(1)                                                                                         |
| Crystal system                                             | monoclinic                                                                                     |
| Space group                                                | <i>P</i> 2 <sub>1</sub> / <i>n</i>                                                             |
| <i>a</i> [Å]                                               | 10.3667(7)                                                                                     |
| <i>b</i> [Å]                                               | 18.8628(12)                                                                                    |
| <i>c</i> [Å]                                               | 11.3870(7)                                                                                     |
| $\alpha$ [°]                                               | 90                                                                                             |
| $\beta$ [°]                                                | 98.150(4)                                                                                      |
| $\gamma$ [°]                                               | 90                                                                                             |
| <i>V</i> [Å <sup>3</sup> ]                                 | 2204.2(2)                                                                                      |
| <i>Z</i>                                                   | 2                                                                                              |
| <i>D</i> <sub>calc</sub> [g·cm <sup>-3</sup> ]             | 1.098                                                                                          |
| $\mu$ (MoK $\alpha$ [mm <sup>-1</sup> ])                   | 0.386                                                                                          |
| Transmissions                                              | 0.75/0.67                                                                                      |
| <i>F</i> (000)                                             | 792                                                                                            |
| Index ranges                                               | -12 ≤ <i>h</i> ≤ 9                                                                             |
|                                                            | -21 ≤ <i>k</i> ≤ 23                                                                            |
|                                                            | -14 ≤ <i>l</i> ≤ 14                                                                            |
| $\theta_{\text{max}}$ [°]                                  | 26.46                                                                                          |
| Reflections collected                                      | 17848                                                                                          |
| Independent reflections                                    | 4491                                                                                           |
| <i>R</i> <sub>int</sub>                                    | 0.1159                                                                                         |
| Refined parameters                                         | 190                                                                                            |
| <i>R</i> <sub>1</sub> [ <i>I</i> > 2σ( <i>I</i> )]         | 0.0564                                                                                         |
| <i>wR</i> <sub>2</sub> [all data]                          | 0.1242                                                                                         |
| $\chi$ (Flack)                                             |                                                                                                |
| GooF                                                       | 0.997                                                                                          |
| $\Delta\rho_{\text{final}}$ (max/min) [e·Å <sup>-3</sup> ] | 0.451/-0.407                                                                                   |

**Table S2: Atomic coordinates ( $\times 10^4$ ) and equivalent isotropic displacement parameters ( $\text{\AA}^2 \times 10^3$ ) for 2a.  $U_{\text{eq}}$  is defined as one third of the trace of the orthogonalized  $U_{ij}$  tensor.**

|        | <i>x</i> | <i>y</i> | <i>z</i> | $U_{\text{eq}}$ |
|--------|----------|----------|----------|-----------------|
| Cl(1)  | -1058(1) | 596(1)   | 4(1)     | 17(1)           |
| Be(1)  | 992(4)   | 500(3)   | 300(4)   | 16(1)           |
| Si(1)  | 1989(1)  | 926(1)   | 2028(1)  | 14(1)           |
| Si(11) | 2290(1)  | 41(1)    | 3479(1)  | 18(1)           |
| Si(12) | 708(1)   | 1807(1)  | 2739(1)  | 18(1)           |
| Si(13) | 4058(1)  | 1438(1)  | 2041(1)  | 18(1)           |
| C(11)  | 3623(4)  | -576(2)  | 3175(4)  | 33(1)           |
| H(11A) | 3683     | -972     | 3736     | 49              |
| H(11B) | 4454     | -319     | 3267     | 49              |
| H(11C) | 3429     | -758     | 2363     | 49              |
| C(12)  | 778(4)   | -504(2)  | 3442(3)  | 27(1)           |
| H(12A) | 969      | -925     | 3940     | 40              |
| H(12B) | 473      | -650     | 2624     | 40              |
| H(12C) | 102      | -222     | 3742     | 40              |
| C(13)  | 2681(4)  | 376(2)   | 5042(3)  | 28(1)           |
| H(13A) | 1953     | 662      | 5241     | 43              |
| H(13B) | 3470     | 668      | 5114     | 43              |
| H(13C) | 2825     | -27      | 5588     | 43              |
| C(21)  | 71(4)    | 2425(2)  | 1493(4)  | 26(1)           |
| H(21A) | -461     | 2158     | 864      | 39              |
| H(21B) | 805      | 2645     | 1175     | 39              |
| H(21C) | -462     | 2795     | 1792     | 39              |
| C(22)  | -753(4)  | 1405(2)  | 3297(4)  | 27(1)           |
| H(22A) | -1272    | 1780     | 3598     | 41              |
| H(22B) | -462     | 1069     | 3937     | 41              |
| H(22C) | -1287    | 1155     | 2646     | 41              |

|        |         |         |          |       |
|--------|---------|---------|----------|-------|
| C(23)  | 1594(4) | 2363(2) | 3968(4)  | 31(1) |
| H(23A) | 2291    | 2629    | 3668     | 46    |
| H(23B) | 1971    | 2055    | 4620     | 46    |
| H(23C) | 982     | 2695    | 4255     | 46    |
| C(31)  | 3955(4) | 2336(2) | 1318(4)  | 27(1) |
| H(31A) | 3489    | 2663    | 1780     | 41    |
| H(31B) | 3486    | 2298    | 511      | 41    |
| H(31C) | 4836    | 2517    | 1287     | 41    |
| C(32)  | 5158(4) | 872(2)  | 1254(4)  | 29(1) |
| H(32A) | 6030    | 1083    | 1344     | 43    |
| H(32B) | 4807    | 843     | 410      | 43    |
| H(32C) | 5210    | 395     | 1599     | 43    |
| C(33)  | 4968(4) | 1554(2) | 3575(3)  | 27(1) |
| H(33A) | 5117    | 1089    | 3955     | 40    |
| H(33B) | 4454    | 1849    | 4044     | 40    |
| H(33C) | 5807    | 1783    | 3528     | 40    |
| O(1)   | 1439(2) | 846(1)  | -915(2)  | 15(1) |
| C(96)  | 2544(3) | 567(2)  | -1455(3) | 19(1) |
| H(96A) | 2239    | 231     | -2103    | 23    |
| H(96B) | 3172    | 320     | -855     | 23    |
| C(97)  | 3162(3) | 1210(2) | -1930(4) | 23(1) |
| H(97A) | 3573    | 1090    | -2638    | 28    |
| H(97B) | 3825    | 1422    | -1320    | 28    |
| C(98)  | 2011(4) | 1702(2) | -2245(3) | 24(1) |
| H(98A) | 2299    | 2201    | -2284    | 29    |
| H(98B) | 1497    | 1570    | -3014    | 29    |
| C(99)  | 1235(3) | 1590(2) | -1230(3) | 18(1) |
| H(99A) | 1558    | 1901    | -551     | 22    |
| H(99B) | 299     | 1690    | -1483    | 22    |



**Table S3: Anisotropic displacement parameters ( $\text{\AA}^2 \times 10^3$ ) for 2a. The anisotropic displacement factor exponent takes the form:  $-2\pi^2[h^2a^{*2}U_{11} + \dots + 2hka^*b^*U_{12}]$**

|        | $U_{11}$ | $U_{22}$ | $U_{33}$ | $U_{23}$ | $U_{13}$ | $U_{12}$ |
|--------|----------|----------|----------|----------|----------|----------|
| Cl(1)  | 14(1)    | 15(1)    | 21(1)    | -1(1)    | 1(1)     | 1(1)     |
| Be(1)  | 14(2)    | 13(3)    | 20(3)    | -3(2)    | 2(2)     | 0(2)     |
| Si(1)  | 14(1)    | 14(1)    | 15(1)    | -1(1)    | 2(1)     | 1(1)     |
| Si(11) | 18(1)    | 19(1)    | 16(1)    | 1(1)     | -1(1)    | 1(1)     |
| Si(12) | 19(1)    | 19(1)    | 17(1)    | -1(1)    | 3(1)     | 5(1)     |
| Si(13) | 15(1)    | 20(1)    | 20(1)    | -3(1)    | 1(1)     | -2(1)    |
| C(11)  | 39(3)    | 28(3)    | 30(3)    | 1(2)     | 2(2)     | 13(2)    |
| C(12)  | 33(2)    | 31(3)    | 15(2)    | 8(2)     | -2(2)    | -11(2)   |
| C(13)  | 29(2)    | 38(3)    | 17(2)    | 2(2)     | 0(2)     | -3(2)    |
| C(21)  | 31(2)    | 18(2)    | 32(3)    | 2(2)     | 13(2)    | 10(2)    |
| C(22)  | 27(2)    | 28(3)    | 29(2)    | 4(2)     | 12(2)    | 7(2)     |
| C(23)  | 32(2)    | 32(3)    | 29(3)    | -10(2)   | 4(2)     | 7(2)     |
| C(31)  | 24(2)    | 26(3)    | 32(3)    | -1(2)    | 2(2)     | -5(2)    |
| C(32)  | 18(2)    | 36(3)    | 32(3)    | -4(2)    | 3(2)     | 3(2)     |
| C(33)  | 21(2)    | 29(3)    | 28(2)    | -2(2)    | -3(2)    | -5(2)    |
| O(1)   | 16(1)    | 14(2)    | 16(1)    | 1(1)     | 5(1)     | 4(1)     |
| C(96)  | 15(2)    | 22(2)    | 23(2)    | -3(2)    | 9(2)     | 5(2)     |
| C(97)  | 19(2)    | 26(3)    | 26(2)    | 2(2)     | 7(2)     | 0(2)     |
| C(98)  | 26(2)    | 23(3)    | 25(2)    | 5(2)     | 8(2)     | -8(2)    |
| C(99)  | 19(2)    | 16(2)    | 19(2)    | -1(2)    | 0(2)     | -3(2)    |

**Table S4: Bond lengths [Å] for 2a.**

|               |            |              |          |
|---------------|------------|--------------|----------|
| Cl(1)-Be(1)#1 | 2.099(5)   | Si(12)-C(23) | 1.881(4) |
| Cl(1)-Be(1)   | 2.112(5)   | Si(12)-C(21) | 1.882(4) |
| Be(1)-O(1)    | 1.654(5)   | Si(12)-C(22) | 1.883(4) |
| Be(1)-Cl(1)#1 | 2.099(5)   | Si(13)-C(33) | 1.877(4) |
| Be(1)-Si(1)   | 2.239(5)   | Si(13)-C(32) | 1.878(4) |
| Si(1)-Si(11)  | 2.3387(15) | Si(13)-C(31) | 1.881(4) |
| Si(1)-Si(12)  | 2.3419(14) | O(1)-C(99)   | 1.458(4) |
| Si(1)-Si(13)  | 2.3499(14) | O(1)-C(96)   | 1.471(4) |
| Si(11)-C(12)  | 1.869(4)   | C(96)-C(97)  | 1.507(5) |
| Si(11)-C(11)  | 1.876(4)   | C(97)-C(98)  | 1.515(5) |
| Si(11)-C(13)  | 1.879(4)   | C(98)-C(99)  | 1.514(5) |

#1 -x,-y,-z

**Table S5: Bond angles [°] for 2a.**

|                     |            |                    |            |
|---------------------|------------|--------------------|------------|
| Be(1)#1-Cl(1)-Be(1) | 83.5(2)    | C(23)-Si(12)-C(21) | 107.3(2)   |
| O(1)-Be(1)-Cl(1)#1  | 103.3(2)   | C(23)-Si(12)-C(22) | 107.80(19) |
| O(1)-Be(1)-Cl(1)    | 103.2(2)   | C(21)-Si(12)-C(22) | 106.92(18) |
| Cl(1)#1-Be(1)-Cl(1) | 96.5(2)    | C(23)-Si(12)-Si(1) | 114.29(13) |
| O(1)-Be(1)-Si(1)    | 116.4(3)   | C(21)-Si(12)-Si(1) | 109.52(13) |
| Cl(1)#1-Be(1)-Si(1) | 118.5(2)   | C(22)-Si(12)-Si(1) | 110.71(13) |
| Cl(1)-Be(1)-Si(1)   | 116.0(2)   | C(33)-Si(13)-C(32) | 104.57(18) |
| Be(1)-Si(1)-Si(11)  | 111.27(14) | C(33)-Si(13)-C(31) | 106.99(19) |
| Be(1)-Si(1)-Si(12)  | 110.17(13) | C(32)-Si(13)-C(31) | 107.72(19) |
| Si(11)-Si(1)-Si(12) | 106.72(5)  | C(33)-Si(13)-Si(1) | 113.02(13) |
| Be(1)-Si(1)-Si(13)  | 117.40(13) | C(32)-Si(13)-Si(1) | 112.28(13) |
| Si(11)-Si(1)-Si(13) | 104.98(5)  | C(31)-Si(13)-Si(1) | 111.82(13) |
| Si(12)-Si(1)-Si(13) | 105.62(6)  | C(99)-O(1)-C(96)   | 109.6(3)   |
| C(12)-Si(11)-C(11)  | 107.0(2)   | C(99)-O(1)-Be(1)   | 122.5(3)   |

|                    |            |                   |          |
|--------------------|------------|-------------------|----------|
| C(12)-Si(11)-C(13) | 105.91(18) | C(96)-O(1)-Be(1)  | 122.4(3) |
| C(11)-Si(11)-C(13) | 108.53(19) | O(1)-C(96)-C(97)  | 105.0(3) |
| C(12)-Si(11)-Si(1) | 110.43(13) | C(96)-C(97)-C(98) | 102.6(3) |
| C(11)-Si(11)-Si(1) | 109.91(14) | C(99)-C(98)-C(97) | 102.7(3) |
| C(13)-Si(11)-Si(1) | 114.72(14) | O(1)-C(99)-C(98)  | 104.3(3) |

#1 -x,-y,-z

Fig. S9 – S12: ELF plots of 1b – 4b.

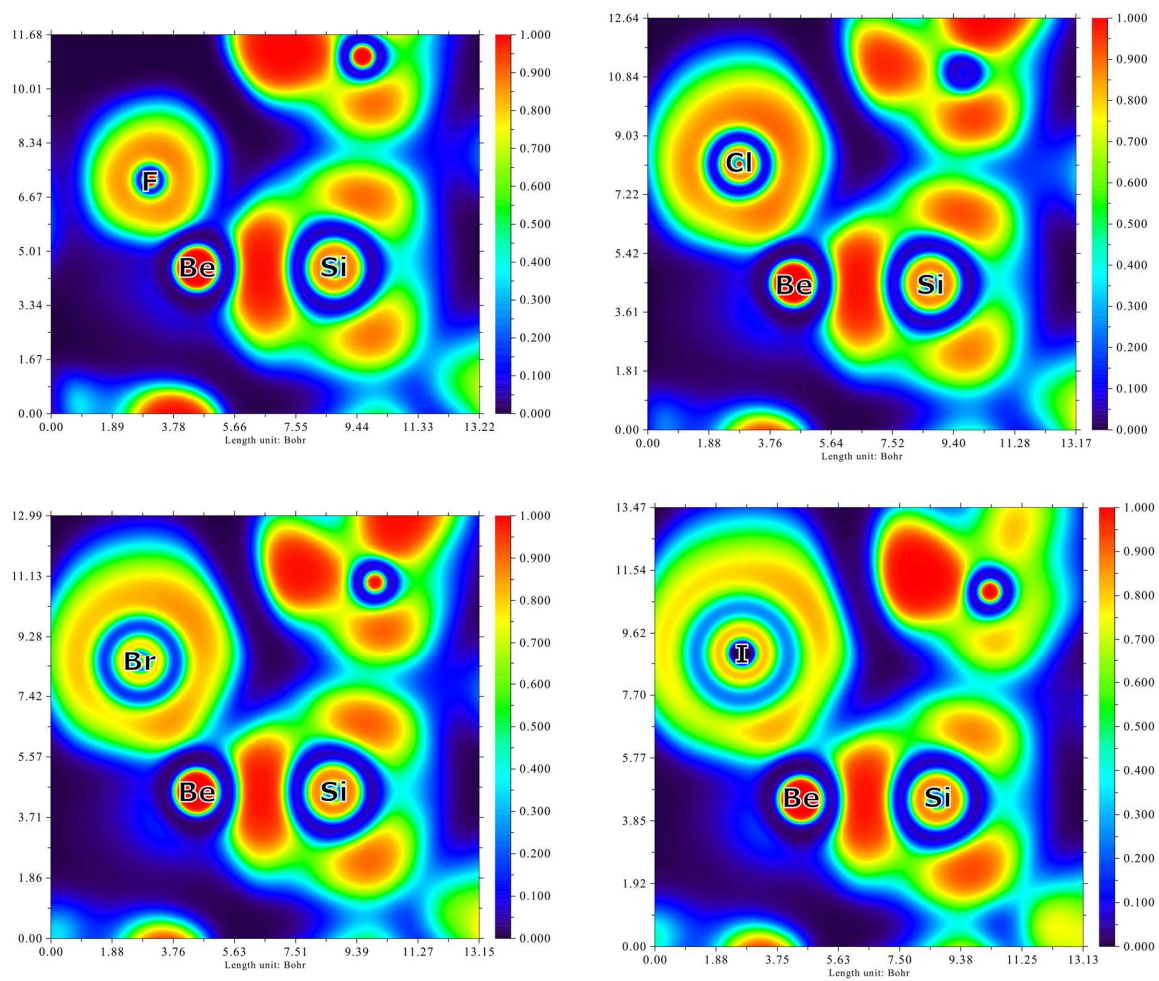

Fig. S13 – S16: LOL plots of **1b** – **4b**.

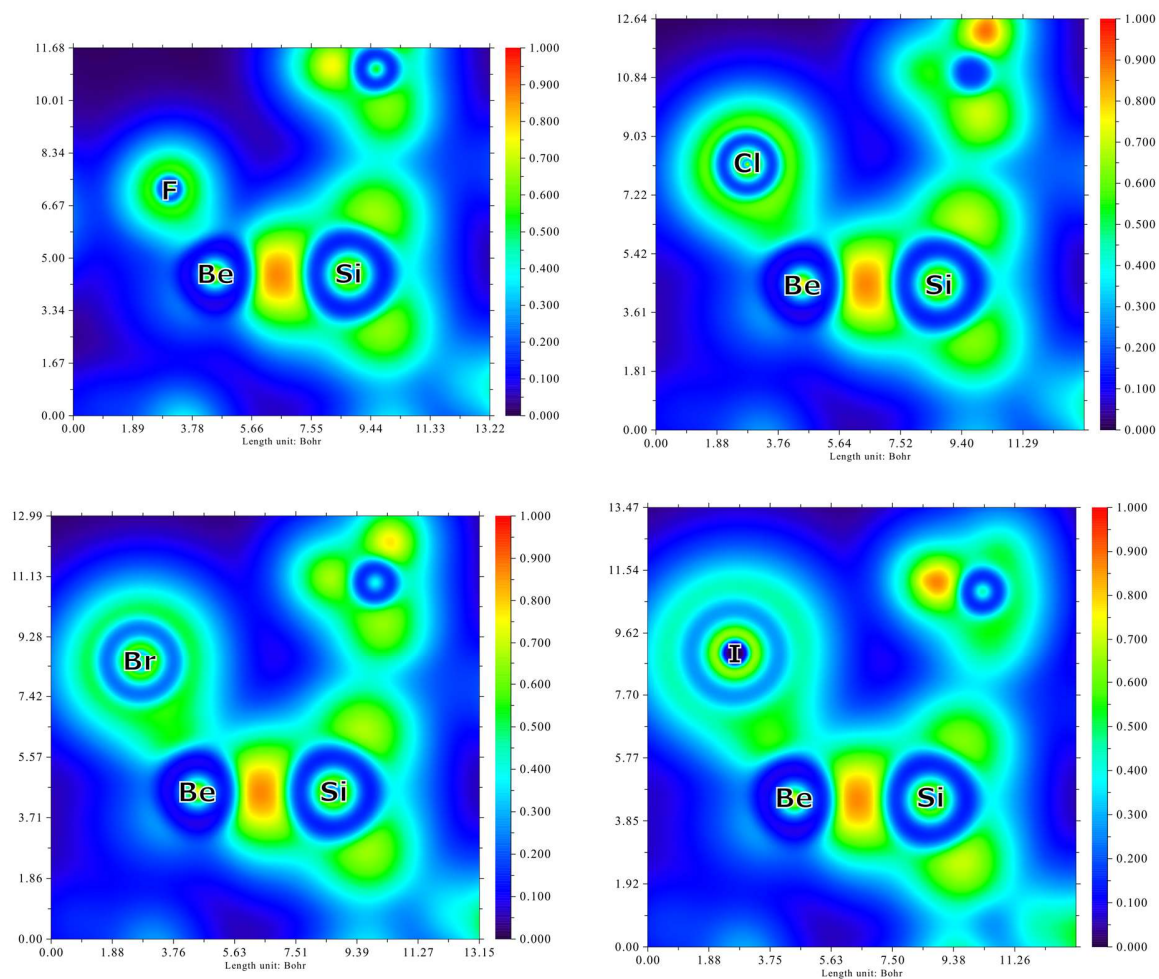

Fig. S17 – S20: Gas phase structures of **1b** – **4b**.

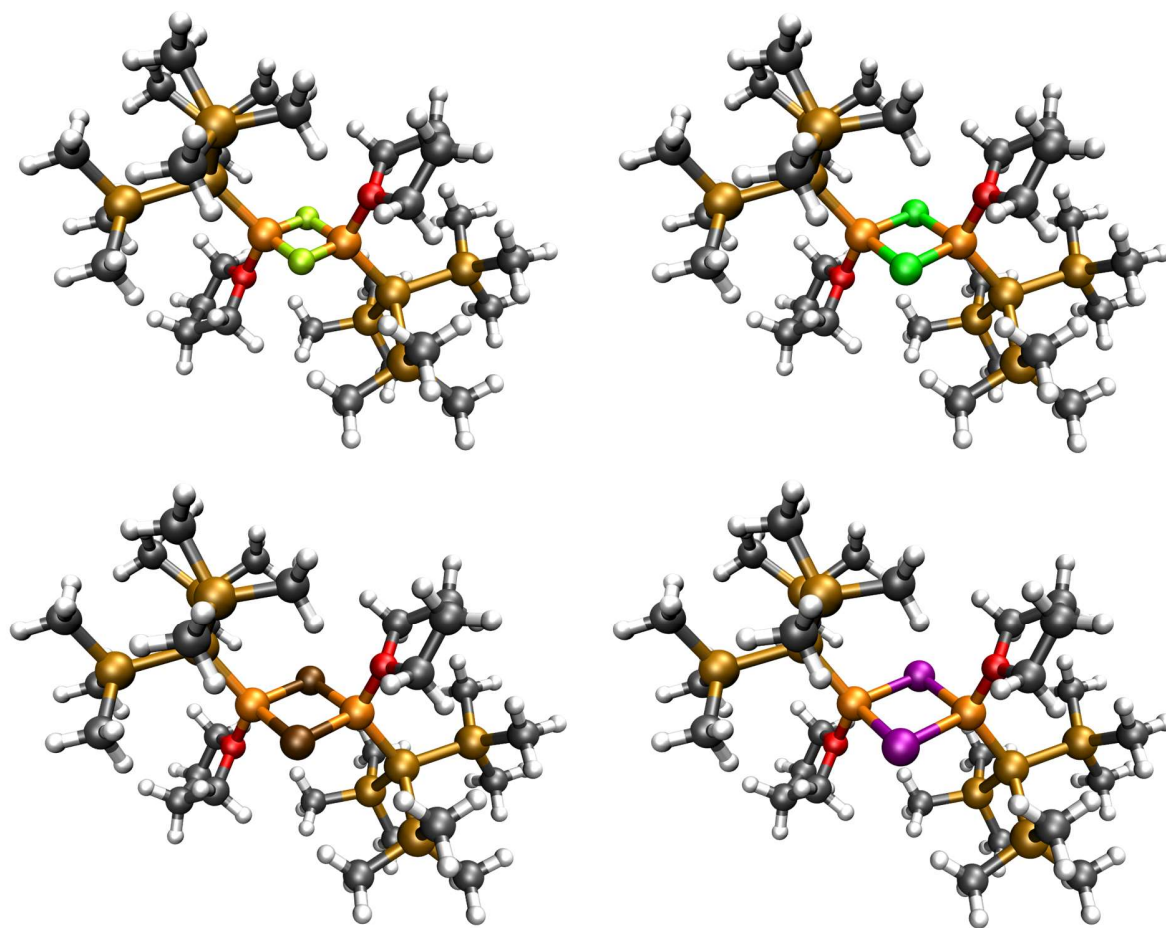

Fig. S21 – S24: Gas phase structures of **1c** – **4c**.

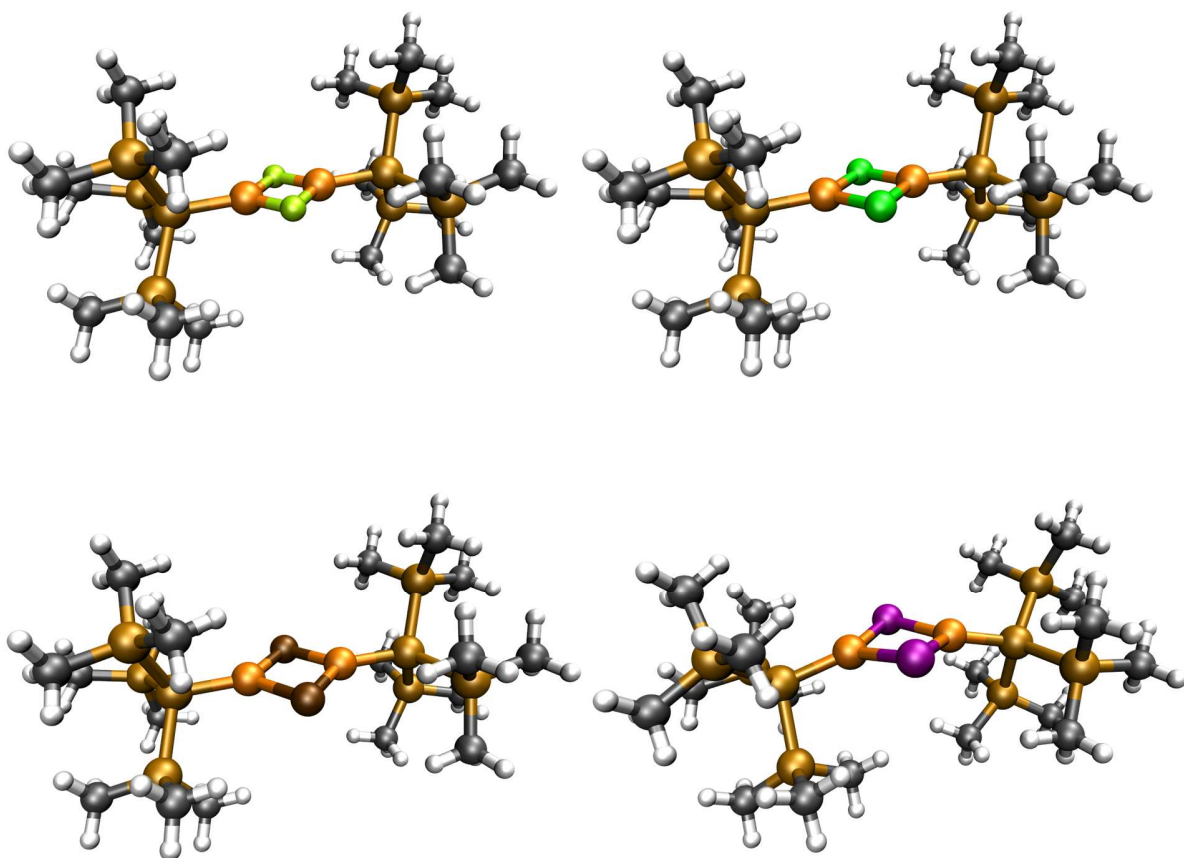

**Table S6.** Computational details of **1b** – **4b**.

Two-electron SEN contributions:

**1b:**

|                                     |                |        |
|-------------------------------------|----------------|--------|
| shared electron number for the pair | 1 c - 2 h =    | 1.3899 |
| shared electron number for the pair | 1 c - 3 h =    | 1.3936 |
| shared electron number for the pair | 1 c - 4 h =    | 1.3748 |
| shared electron number for the pair | 1 c - 5 si =   | 1.3757 |
| shared electron number for the pair | 2 h - 3 h =    | 0.0236 |
| shared electron number for the pair | 2 h - 4 h =    | 0.0231 |
| shared electron number for the pair | 2 h - 5 si =   | 0.0370 |
| shared electron number for the pair | 3 h - 4 h =    | 0.0236 |
| shared electron number for the pair | 3 h - 5 si =   | 0.0347 |
| shared electron number for the pair | 4 h - 5 si =   | 0.0319 |
| shared electron number for the pair | 5 si - 6 si =  | 1.3349 |
| shared electron number for the pair | 5 si - 7 c =   | 1.3795 |
| shared electron number for the pair | 5 si - 8 c =   | 1.3772 |
| shared electron number for the pair | 5 si - 9 be =  | 0.0222 |
| shared electron number for the pair | 5 si - 10 si = | 0.0249 |
| shared electron number for the pair | 5 si - 11 si = | 0.0244 |
| shared electron number for the pair | 5 si - 12 h =  | 0.0307 |
| shared electron number for the pair | 5 si - 13 h =  | 0.0342 |
| shared electron number for the pair | 5 si - 14 h =  | 0.0353 |
| shared electron number for the pair | 5 si - 15 h =  | 0.0327 |
| shared electron number for the pair | 5 si - 16 h =  | 0.0384 |
| shared electron number for the pair | 5 si - 17 h =  | 0.0360 |
| shared electron number for the pair | 6 si - 9 be =  | 1.4215 |
| shared electron number for the pair | 6 si - 10 si = | 1.3495 |
| shared electron number for the pair | 6 si - 11 si = | 1.3387 |
| shared electron number for the pair | 6 si - 20 be = | 0.0663 |
| shared electron number for the pair | 7 c - 12 h =   | 1.3744 |
| shared electron number for the pair | 7 c - 13 h =   | 1.3942 |
| shared electron number for the pair | 7 c - 14 h =   | 1.3945 |
| shared electron number for the pair | 8 c - 9 be =   | 0.0114 |
| shared electron number for the pair | 8 c - 15 h =   | 1.3843 |
| shared electron number for the pair | 8 c - 16 h =   | 1.3729 |
| shared electron number for the pair | 8 c - 17 h =   | 1.3926 |
| shared electron number for the pair | 9 be - 10 si = | 0.0209 |
| shared electron number for the pair | 9 be - 11 si = | 0.0258 |
| shared electron number for the pair | 9 be - 18 f =  | 0.2174 |
| shared electron number for the pair | 9 be - 19 f =  | 0.1682 |
| shared electron number for the pair | 9 be - 21 o =  | 0.1454 |
| shared electron number for the pair | 9 be - 29 si = | 0.0660 |
| shared electron number for the pair | 9 be - 30 o =  | 0.0506 |
| shared electron number for the pair | 9 be - 32 c =  | 0.0331 |



|                                     |                 |        |
|-------------------------------------|-----------------|--------|
| shared electron number for the pair | 9 be - 33 c =   | 0.0514 |
| shared electron number for the pair | 9 be - 55 c =   | 0.0143 |
| shared electron number for the pair | 9 be - 58 c =   | 0.0100 |
| shared electron number for the pair | 9 be - 60 h =   | 0.0218 |
| shared electron number for the pair | 10 si - 11 si = | 0.0220 |
| shared electron number for the pair | 10 si - 23 c =  | 1.3658 |
| shared electron number for the pair | 10 si - 24 c =  | 1.3719 |
| shared electron number for the pair | 10 si - 25 c =  | 1.3784 |
| shared electron number for the pair | 10 si - 34 h =  | 0.0366 |
| shared electron number for the pair | 10 si - 35 h =  | 0.0357 |
| shared electron number for the pair | 10 si - 36 h =  | 0.0312 |
| shared electron number for the pair | 10 si - 37 h =  | 0.0310 |
| shared electron number for the pair | 10 si - 38 h =  | 0.0363 |
| shared electron number for the pair | 10 si - 39 h =  | 0.0360 |
| shared electron number for the pair | 10 si - 40 h =  | 0.0372 |
| shared electron number for the pair | 10 si - 41 h =  | 0.0369 |
| shared electron number for the pair | 10 si - 42 h =  | 0.0330 |
| shared electron number for the pair | 11 si - 26 c =  | 1.3729 |
| shared electron number for the pair | 11 si - 27 c =  | 1.3755 |
| shared electron number for the pair | 11 si - 28 c =  | 1.3871 |
| shared electron number for the pair | 11 si - 43 h =  | 0.0353 |
| shared electron number for the pair | 11 si - 44 h =  | 0.0334 |
| shared electron number for the pair | 11 si - 45 h =  | 0.0312 |
| shared electron number for the pair | 11 si - 46 h =  | 0.0314 |
| shared electron number for the pair | 11 si - 47 h =  | 0.0332 |
| shared electron number for the pair | 11 si - 48 h =  | 0.0344 |
| shared electron number for the pair | 11 si - 49 h =  | 0.0357 |
| shared electron number for the pair | 11 si - 50 h =  | 0.0353 |
| shared electron number for the pair | 11 si - 51 h =  | 0.0323 |
| shared electron number for the pair | 12 h - 13 h =   | 0.0232 |
| shared electron number for the pair | 12 h - 14 h =   | 0.0229 |
| shared electron number for the pair | 13 h - 14 h =   | 0.0230 |
| shared electron number for the pair | 15 h - 16 h =   | 0.0224 |
| shared electron number for the pair | 15 h - 17 h =   | 0.0224 |
| shared electron number for the pair | 16 h - 17 h =   | 0.0226 |
| shared electron number for the pair | 18 f - 20 be =  | 0.1687 |
| shared electron number for the pair | 19 f - 20 be =  | 0.2176 |
| shared electron number for the pair | 20 be - 21 o =  | 0.0507 |
| shared electron number for the pair | 20 be - 29 si = | 1.4214 |
| shared electron number for the pair | 20 be - 30 o =  | 0.1444 |
| shared electron number for the pair | 20 be - 32 c =  | 0.0143 |
| shared electron number for the pair | 20 be - 52 si = | 0.0222 |
| shared electron number for the pair | 20 be - 53 si = | 0.0208 |
| shared electron number for the pair | 20 be - 54 si = | 0.0259 |
| shared electron number for the pair | 20 be - 55 c =  | 0.0328 |
| shared electron number for the pair | 20 be - 56 c =  | 0.0512 |
| shared electron number for the pair | 20 be - 63 c =  | 0.0114 |
| shared electron number for the pair | 20 be - 74 h =  | 0.0218 |

|                                     |                 |        |
|-------------------------------------|-----------------|--------|
| shared electron number for the pair | 21 o - 32 c =   | 1.0332 |
| shared electron number for the pair | 21 o - 33 c =   | 1.0430 |
| shared electron number for the pair | 22 h - 32 c =   | 1.3600 |
| shared electron number for the pair | 22 h - 57 h =   | 0.0186 |
| shared electron number for the pair | 22 h - 58 c =   | 0.0239 |
| shared electron number for the pair | 23 c - 34 h =   | 1.3941 |
| shared electron number for the pair | 23 c - 35 h =   | 1.3974 |
| shared electron number for the pair | 23 c - 36 h =   | 1.3732 |
| shared electron number for the pair | 24 c - 37 h =   | 1.3740 |
| shared electron number for the pair | 24 c - 38 h =   | 1.3939 |
| shared electron number for the pair | 24 c - 39 h =   | 1.3968 |
| shared electron number for the pair | 25 c - 40 h =   | 1.3917 |
| shared electron number for the pair | 25 c - 41 h =   | 1.3944 |
| shared electron number for the pair | 25 c - 42 h =   | 1.3729 |
| shared electron number for the pair | 26 c - 43 h =   | 1.3976 |
| shared electron number for the pair | 26 c - 44 h =   | 1.3869 |
| shared electron number for the pair | 26 c - 45 h =   | 1.3734 |
| shared electron number for the pair | 27 c - 46 h =   | 1.3748 |
| shared electron number for the pair | 27 c - 47 h =   | 1.3805 |
| shared electron number for the pair | 27 c - 48 h =   | 1.3949 |
| shared electron number for the pair | 28 c - 49 h =   | 1.3932 |
| shared electron number for the pair | 28 c - 50 h =   | 1.3977 |
| shared electron number for the pair | 28 c - 51 h =   | 1.3687 |
| shared electron number for the pair | 29 si - 52 si = | 1.3351 |
| shared electron number for the pair | 29 si - 53 si = | 1.3497 |
| shared electron number for the pair | 29 si - 54 si = | 1.3389 |
| shared electron number for the pair | 30 o - 55 c =   | 1.0332 |
| shared electron number for the pair | 30 o - 56 c =   | 1.0430 |
| shared electron number for the pair | 31 h - 55 c =   | 1.3600 |
| shared electron number for the pair | 31 h - 71 h =   | 0.0186 |
| shared electron number for the pair | 31 h - 72 c =   | 0.0239 |
| shared electron number for the pair | 32 c - 33 c =   | 0.0310 |
| shared electron number for the pair | 32 c - 57 h =   | 1.3448 |
| shared electron number for the pair | 32 c - 58 c =   | 1.3538 |
| shared electron number for the pair | 32 c - 59 c =   | 0.0497 |
| shared electron number for the pair | 32 c - 76 h =   | 0.0328 |
| shared electron number for the pair | 32 c - 77 h =   | 0.0262 |
| shared electron number for the pair | 33 c - 58 c =   | 0.0509 |
| shared electron number for the pair | 33 c - 59 c =   | 1.3527 |
| shared electron number for the pair | 33 c - 60 h =   | 1.3492 |
| shared electron number for the pair | 33 c - 61 h =   | 1.3650 |
| shared electron number for the pair | 33 c - 78 h =   | 0.0308 |
| shared electron number for the pair | 33 c - 79 h =   | 0.0252 |
| shared electron number for the pair | 34 h - 35 h =   | 0.0231 |
| shared electron number for the pair | 34 h - 36 h =   | 0.0231 |
| shared electron number for the pair | 35 h - 36 h =   | 0.0231 |
| shared electron number for the pair | 37 h - 38 h =   | 0.0225 |
| shared electron number for the pair | 37 h - 39 h =   | 0.0228 |

|                                     |                 |        |
|-------------------------------------|-----------------|--------|
| shared electron number for the pair | 38 h - 39 h =   | 0.0230 |
| shared electron number for the pair | 40 h - 41 h =   | 0.0237 |
| shared electron number for the pair | 40 h - 42 h =   | 0.0234 |
| shared electron number for the pair | 41 h - 42 h =   | 0.0231 |
| shared electron number for the pair | 43 h - 44 h =   | 0.0230 |
| shared electron number for the pair | 43 h - 45 h =   | 0.0231 |
| shared electron number for the pair | 44 h - 45 h =   | 0.0233 |
| shared electron number for the pair | 46 h - 47 h =   | 0.0229 |
| shared electron number for the pair | 46 h - 48 h =   | 0.0230 |
| shared electron number for the pair | 47 h - 48 h =   | 0.0237 |
| shared electron number for the pair | 49 h - 50 h =   | 0.0235 |
| shared electron number for the pair | 49 h - 51 h =   | 0.0233 |
| shared electron number for the pair | 50 h - 51 h =   | 0.0231 |
| shared electron number for the pair | 52 si - 53 si = | 0.0249 |
| shared electron number for the pair | 52 si - 54 si = | 0.0244 |
| shared electron number for the pair | 52 si - 62 c =  | 1.3795 |
| shared electron number for the pair | 52 si - 63 c =  | 1.3770 |
| shared electron number for the pair | 52 si - 64 c =  | 1.3758 |
| shared electron number for the pair | 52 si - 80 h =  | 0.0307 |
| shared electron number for the pair | 52 si - 81 h =  | 0.0342 |
| shared electron number for the pair | 52 si - 82 h =  | 0.0353 |
| shared electron number for the pair | 52 si - 83 h =  | 0.0327 |
| shared electron number for the pair | 52 si - 84 h =  | 0.0385 |
| shared electron number for the pair | 52 si - 85 h =  | 0.0360 |
| shared electron number for the pair | 52 si - 86 h =  | 0.0370 |
| shared electron number for the pair | 52 si - 87 h =  | 0.0347 |
| shared electron number for the pair | 52 si - 88 h =  | 0.0319 |
| shared electron number for the pair | 53 si - 54 si = | 0.0220 |
| shared electron number for the pair | 53 si - 65 c =  | 1.3657 |
| shared electron number for the pair | 53 si - 66 c =  | 1.3721 |
| shared electron number for the pair | 53 si - 67 c =  | 1.3784 |
| shared electron number for the pair | 53 si - 89 h =  | 0.0366 |
| shared electron number for the pair | 53 si - 90 h =  | 0.0357 |
| shared electron number for the pair | 53 si - 91 h =  | 0.0312 |
| shared electron number for the pair | 53 si - 92 h =  | 0.0310 |
| shared electron number for the pair | 53 si - 93 h =  | 0.0363 |
| shared electron number for the pair | 53 si - 94 h =  | 0.0360 |
| shared electron number for the pair | 53 si - 95 h =  | 0.0372 |
| shared electron number for the pair | 53 si - 96 h =  | 0.0369 |
| shared electron number for the pair | 53 si - 97 h =  | 0.0330 |
| shared electron number for the pair | 54 si - 68 c =  | 1.3730 |
| shared electron number for the pair | 54 si - 69 c =  | 1.3755 |
| shared electron number for the pair | 54 si - 70 c =  | 1.3871 |
| shared electron number for the pair | 54 si - 98 h =  | 0.0353 |
| shared electron number for the pair | 54 si - 99 h =  | 0.0334 |
| shared electron number for the pair | 54 si - 100 h = | 0.0312 |
| shared electron number for the pair | 54 si - 101 h = | 0.0314 |
| shared electron number for the pair | 54 si - 102 h = | 0.0332 |

|                                     |                 |        |
|-------------------------------------|-----------------|--------|
| shared electron number for the pair | 54 si - 103 h = | 0.0344 |
| shared electron number for the pair | 54 si - 104 h = | 0.0357 |
| shared electron number for the pair | 54 si - 105 h = | 0.0353 |
| shared electron number for the pair | 54 si - 106 h = | 0.0323 |
| shared electron number for the pair | 55 c - 56 c =   | 0.0310 |
| shared electron number for the pair | 55 c - 71 h =   | 1.3448 |
| shared electron number for the pair | 55 c - 72 c =   | 1.3537 |
| shared electron number for the pair | 55 c - 73 c =   | 0.0497 |
| shared electron number for the pair | 55 c - 107 h =  | 0.0328 |
| shared electron number for the pair | 55 c - 108 h =  | 0.0262 |
| shared electron number for the pair | 56 c - 72 c =   | 0.0509 |
| shared electron number for the pair | 56 c - 73 c =   | 1.3527 |
| shared electron number for the pair | 56 c - 74 h =   | 1.3491 |
| shared electron number for the pair | 56 c - 75 h =   | 1.3650 |
| shared electron number for the pair | 56 c - 109 h =  | 0.0307 |
| shared electron number for the pair | 56 c - 110 h =  | 0.0252 |
| shared electron number for the pair | 57 h - 58 c =   | 0.0195 |
| shared electron number for the pair | 58 c - 59 c =   | 1.3533 |
| shared electron number for the pair | 58 c - 76 h =   | 1.3798 |
| shared electron number for the pair | 58 c - 77 h =   | 1.3746 |
| shared electron number for the pair | 58 c - 78 h =   | 0.0293 |
| shared electron number for the pair | 58 c - 79 h =   | 0.0237 |
| shared electron number for the pair | 59 c - 60 h =   | 0.0221 |
| shared electron number for the pair | 59 c - 61 h =   | 0.0232 |
| shared electron number for the pair | 59 c - 76 h =   | 0.0283 |
| shared electron number for the pair | 59 c - 77 h =   | 0.0250 |
| shared electron number for the pair | 59 c - 78 h =   | 1.3825 |
| shared electron number for the pair | 59 c - 79 h =   | 1.3742 |
| shared electron number for the pair | 60 h - 61 h =   | 0.0189 |
| shared electron number for the pair | 62 c - 80 h =   | 1.3745 |
| shared electron number for the pair | 62 c - 81 h =   | 1.3942 |
| shared electron number for the pair | 62 c - 82 h =   | 1.3945 |
| shared electron number for the pair | 63 c - 83 h =   | 1.3844 |
| shared electron number for the pair | 63 c - 84 h =   | 1.3730 |
| shared electron number for the pair | 63 c - 85 h =   | 1.3926 |
| shared electron number for the pair | 64 c - 86 h =   | 1.3899 |
| shared electron number for the pair | 64 c - 87 h =   | 1.3936 |
| shared electron number for the pair | 64 c - 88 h =   | 1.3748 |
| shared electron number for the pair | 65 c - 89 h =   | 1.3940 |
| shared electron number for the pair | 65 c - 90 h =   | 1.3974 |
| shared electron number for the pair | 65 c - 91 h =   | 1.3732 |
| shared electron number for the pair | 66 c - 92 h =   | 1.3739 |
| shared electron number for the pair | 66 c - 93 h =   | 1.3939 |
| shared electron number for the pair | 66 c - 94 h =   | 1.3968 |
| shared electron number for the pair | 67 c - 95 h =   | 1.3917 |
| shared electron number for the pair | 67 c - 96 h =   | 1.3944 |
| shared electron number for the pair | 67 c - 97 h =   | 1.3728 |
| shared electron number for the pair | 68 c - 98 h =   | 1.3976 |

|                                     |                 |        |
|-------------------------------------|-----------------|--------|
| shared electron number for the pair | 68 c - 99 h =   | 1.3869 |
| shared electron number for the pair | 68 c - 100 h =  | 1.3734 |
| shared electron number for the pair | 69 c - 101 h =  | 1.3749 |
| shared electron number for the pair | 69 c - 102 h =  | 1.3804 |
| shared electron number for the pair | 69 c - 103 h =  | 1.3949 |
| shared electron number for the pair | 70 c - 104 h =  | 1.3932 |
| shared electron number for the pair | 70 c - 105 h =  | 1.3978 |
| shared electron number for the pair | 70 c - 106 h =  | 1.3687 |
| shared electron number for the pair | 71 h - 72 c =   | 0.0195 |
| shared electron number for the pair | 72 c - 73 c =   | 1.3533 |
| shared electron number for the pair | 72 c - 107 h =  | 1.3798 |
| shared electron number for the pair | 72 c - 108 h =  | 1.3746 |
| shared electron number for the pair | 72 c - 109 h =  | 0.0293 |
| shared electron number for the pair | 72 c - 110 h =  | 0.0237 |
| shared electron number for the pair | 73 c - 74 h =   | 0.0221 |
| shared electron number for the pair | 73 c - 75 h =   | 0.0232 |
| shared electron number for the pair | 73 c - 107 h =  | 0.0283 |
| shared electron number for the pair | 73 c - 108 h =  | 0.0250 |
| shared electron number for the pair | 73 c - 109 h =  | 1.3826 |
| shared electron number for the pair | 73 c - 110 h =  | 1.3741 |
| shared electron number for the pair | 74 h - 75 h =   | 0.0189 |
| shared electron number for the pair | 76 h - 77 h =   | 0.0232 |
| shared electron number for the pair | 78 h - 79 h =   | 0.0230 |
| shared electron number for the pair | 80 h - 81 h =   | 0.0232 |
| shared electron number for the pair | 80 h - 82 h =   | 0.0229 |
| shared electron number for the pair | 81 h - 82 h =   | 0.0230 |
| shared electron number for the pair | 83 h - 84 h =   | 0.0224 |
| shared electron number for the pair | 83 h - 85 h =   | 0.0224 |
| shared electron number for the pair | 84 h - 85 h =   | 0.0226 |
| shared electron number for the pair | 86 h - 87 h =   | 0.0236 |
| shared electron number for the pair | 86 h - 88 h =   | 0.0231 |
| shared electron number for the pair | 87 h - 88 h =   | 0.0236 |
| shared electron number for the pair | 89 h - 90 h =   | 0.0231 |
| shared electron number for the pair | 89 h - 91 h =   | 0.0231 |
| shared electron number for the pair | 90 h - 91 h =   | 0.0231 |
| shared electron number for the pair | 92 h - 93 h =   | 0.0225 |
| shared electron number for the pair | 92 h - 94 h =   | 0.0228 |
| shared electron number for the pair | 93 h - 94 h =   | 0.0230 |
| shared electron number for the pair | 95 h - 96 h =   | 0.0237 |
| shared electron number for the pair | 95 h - 97 h =   | 0.0233 |
| shared electron number for the pair | 96 h - 97 h =   | 0.0231 |
| shared electron number for the pair | 98 h - 99 h =   | 0.0230 |
| shared electron number for the pair | 98 h - 100 h =  | 0.0231 |
| shared electron number for the pair | 99 h - 100 h =  | 0.0233 |
| shared electron number for the pair | 101 h - 102 h = | 0.0229 |
| shared electron number for the pair | 101 h - 103 h = | 0.0230 |
| shared electron number for the pair | 102 h - 103 h = | 0.0237 |
| shared electron number for the pair | 104 h - 105 h = | 0.0235 |

|                                     |                 |        |
|-------------------------------------|-----------------|--------|
| shared electron number for the pair | 104 h - 106 h = | 0.0233 |
| shared electron number for the pair | 105 h - 106 h = | 0.0231 |
| shared electron number for the pair | 107 h - 108 h = | 0.0232 |
| shared electron number for the pair | 109 h - 110 h = | 0.0230 |

## 2b:

|                                     |                |        |
|-------------------------------------|----------------|--------|
| shared electron number for the pair | 1 c - 2 h =    | 1.3892 |
| shared electron number for the pair | 1 c - 3 h =    | 1.3913 |
| shared electron number for the pair | 1 c - 4 h =    | 1.3774 |
| shared electron number for the pair | 1 c - 5 si =   | 1.3812 |
| shared electron number for the pair | 2 h - 3 h =    | 0.0236 |
| shared electron number for the pair | 2 h - 4 h =    | 0.0229 |
| shared electron number for the pair | 2 h - 5 si =   | 0.0364 |
| shared electron number for the pair | 3 h - 4 h =    | 0.0232 |
| shared electron number for the pair | 3 h - 5 si =   | 0.0352 |
| shared electron number for the pair | 4 h - 5 si =   | 0.0322 |
| shared electron number for the pair | 5 si - 6 si =  | 1.3373 |
| shared electron number for the pair | 5 si - 7 c =   | 1.3813 |
| shared electron number for the pair | 5 si - 8 c =   | 1.3705 |
| shared electron number for the pair | 5 si - 9 be =  | 0.0297 |
| shared electron number for the pair | 5 si - 10 si = | 0.0229 |
| shared electron number for the pair | 5 si - 11 si = | 0.0235 |
| shared electron number for the pair | 5 si - 12 h =  | 0.0303 |
| shared electron number for the pair | 5 si - 13 h =  | 0.0349 |
| shared electron number for the pair | 5 si - 14 h =  | 0.0353 |
| shared electron number for the pair | 5 si - 15 h =  | 0.0319 |
| shared electron number for the pair | 5 si - 16 h =  | 0.0388 |
| shared electron number for the pair | 5 si - 17 h =  | 0.0367 |
| shared electron number for the pair | 6 si - 9 be =  | 1.3598 |
| shared electron number for the pair | 6 si - 10 si = | 1.3483 |
| shared electron number for the pair | 6 si - 11 si = | 1.3413 |
| shared electron number for the pair | 6 si - 20 be = | 0.0115 |
| shared electron number for the pair | 7 c - 12 h =   | 1.3721 |
| shared electron number for the pair | 7 c - 13 h =   | 1.3937 |
| shared electron number for the pair | 7 c - 14 h =   | 1.3970 |
| shared electron number for the pair | 8 c - 9 be =   | 0.0122 |
| shared electron number for the pair | 8 c - 15 h =   | 1.3867 |
| shared electron number for the pair | 8 c - 16 h =   | 1.3795 |
| shared electron number for the pair | 8 c - 17 h =   | 1.3915 |
| shared electron number for the pair | 9 be - 10 si = | 0.0172 |
| shared electron number for the pair | 9 be - 11 si = | 0.0193 |
| shared electron number for the pair | 9 be - 18 cl = | 0.1314 |
| shared electron number for the pair | 9 be - 19 cl = | 0.1076 |
| shared electron number for the pair | 9 be - 20 be = | 0.0107 |
| shared electron number for the pair | 9 be - 21 o =  | 0.4850 |
| shared electron number for the pair | 9 be - 22 h =  | 0.0148 |

|                                     |                 |        |
|-------------------------------------|-----------------|--------|
| shared electron number for the pair | 9 be - 29 si =  | 0.0116 |
| shared electron number for the pair | 9 be - 30 o =   | 0.0104 |
| shared electron number for the pair | 9 be - 32 c =   | 0.0484 |
| shared electron number for the pair | 9 be - 33 c =   | 0.0677 |
| shared electron number for the pair | 9 be - 58 c =   | 0.0122 |
| shared electron number for the pair | 9 be - 60 h =   | 0.0258 |
| shared electron number for the pair | 9 be - 61 h =   | 0.0114 |
| shared electron number for the pair | 10 si - 11 si = | 0.0211 |
| shared electron number for the pair | 10 si - 23 c =  | 1.3653 |
| shared electron number for the pair | 10 si - 24 c =  | 1.3701 |
| shared electron number for the pair | 10 si - 25 c =  | 1.3785 |
| shared electron number for the pair | 10 si - 34 h =  | 0.0363 |
| shared electron number for the pair | 10 si - 35 h =  | 0.0357 |
| shared electron number for the pair | 10 si - 36 h =  | 0.0310 |
| shared electron number for the pair | 10 si - 37 h =  | 0.0312 |
| shared electron number for the pair | 10 si - 38 h =  | 0.0366 |
| shared electron number for the pair | 10 si - 39 h =  | 0.0363 |
| shared electron number for the pair | 10 si - 40 h =  | 0.0367 |
| shared electron number for the pair | 10 si - 41 h =  | 0.0368 |
| shared electron number for the pair | 10 si - 42 h =  | 0.0328 |
| shared electron number for the pair | 11 si - 26 c =  | 1.3724 |
| shared electron number for the pair | 11 si - 27 c =  | 1.3731 |
| shared electron number for the pair | 11 si - 28 c =  | 1.3772 |
| shared electron number for the pair | 11 si - 43 h =  | 0.0350 |
| shared electron number for the pair | 11 si - 44 h =  | 0.0339 |
| shared electron number for the pair | 11 si - 45 h =  | 0.0310 |
| shared electron number for the pair | 11 si - 46 h =  | 0.0315 |
| shared electron number for the pair | 11 si - 47 h =  | 0.0340 |
| shared electron number for the pair | 11 si - 48 h =  | 0.0350 |
| shared electron number for the pair | 11 si - 49 h =  | 0.0362 |
| shared electron number for the pair | 11 si - 50 h =  | 0.0357 |
| shared electron number for the pair | 11 si - 51 h =  | 0.0316 |
| shared electron number for the pair | 12 h - 13 h =   | 0.0230 |
| shared electron number for the pair | 12 h - 14 h =   | 0.0228 |
| shared electron number for the pair | 13 h - 14 h =   | 0.0231 |
| shared electron number for the pair | 15 h - 16 h =   | 0.0229 |
| shared electron number for the pair | 15 h - 17 h =   | 0.0222 |
| shared electron number for the pair | 16 h - 17 h =   | 0.0237 |
| shared electron number for the pair | 18 cl - 20 be = | 0.1078 |
| shared electron number for the pair | 19 cl - 20 be = | 0.1305 |
| shared electron number for the pair | 20 be - 21 o =  | 0.0104 |
| shared electron number for the pair | 20 be - 29 si = | 1.3597 |
| shared electron number for the pair | 20 be - 30 o =  | 0.4860 |
| shared electron number for the pair | 20 be - 31 h =  | 0.0149 |
| shared electron number for the pair | 20 be - 52 si = | 0.0293 |
| shared electron number for the pair | 20 be - 53 si = | 0.0175 |
| shared electron number for the pair | 20 be - 54 si = | 0.0192 |
| shared electron number for the pair | 20 be - 55 c =  | 0.0486 |

|                                     |                 |        |
|-------------------------------------|-----------------|--------|
| shared electron number for the pair | 20 be - 56 c =  | 0.0672 |
| shared electron number for the pair | 20 be - 63 c =  | 0.0121 |
| shared electron number for the pair | 20 be - 72 c =  | 0.0122 |
| shared electron number for the pair | 20 be - 74 h =  | 0.0256 |
| shared electron number for the pair | 20 be - 75 h =  | 0.0114 |
| shared electron number for the pair | 21 o - 32 c =   | 1.0185 |
| shared electron number for the pair | 21 o - 33 c =   | 1.0270 |
| shared electron number for the pair | 22 h - 32 c =   | 1.3644 |
| shared electron number for the pair | 22 h - 57 h =   | 0.0184 |
| shared electron number for the pair | 22 h - 58 c =   | 0.0236 |
| shared electron number for the pair | 23 c - 34 h =   | 1.3944 |
| shared electron number for the pair | 23 c - 35 h =   | 1.3955 |
| shared electron number for the pair | 23 c - 36 h =   | 1.3724 |
| shared electron number for the pair | 24 c - 37 h =   | 1.3730 |
| shared electron number for the pair | 24 c - 38 h =   | 1.3930 |
| shared electron number for the pair | 24 c - 39 h =   | 1.3975 |
| shared electron number for the pair | 25 c - 40 h =   | 1.3905 |
| shared electron number for the pair | 25 c - 41 h =   | 1.3939 |
| shared electron number for the pair | 25 c - 42 h =   | 1.3733 |
| shared electron number for the pair | 26 c - 43 h =   | 1.3964 |
| shared electron number for the pair | 26 c - 44 h =   | 1.3853 |
| shared electron number for the pair | 26 c - 45 h =   | 1.3742 |
| shared electron number for the pair | 27 c - 46 h =   | 1.3760 |
| shared electron number for the pair | 27 c - 47 h =   | 1.3778 |
| shared electron number for the pair | 27 c - 48 h =   | 1.3949 |
| shared electron number for the pair | 28 c - 49 h =   | 1.3936 |
| shared electron number for the pair | 28 c - 50 h =   | 1.3976 |
| shared electron number for the pair | 28 c - 51 h =   | 1.3691 |
| shared electron number for the pair | 29 si - 52 si = | 1.3373 |
| shared electron number for the pair | 29 si - 53 si = | 1.3482 |
| shared electron number for the pair | 29 si - 54 si = | 1.3408 |
| shared electron number for the pair | 30 o - 55 c =   | 1.0186 |
| shared electron number for the pair | 30 o - 56 c =   | 1.0268 |
| shared electron number for the pair | 31 h - 55 c =   | 1.3644 |
| shared electron number for the pair | 31 h - 71 h =   | 0.0185 |
| shared electron number for the pair | 31 h - 72 c =   | 0.0236 |
| shared electron number for the pair | 32 c - 33 c =   | 0.0269 |
| shared electron number for the pair | 32 c - 57 h =   | 1.3435 |
| shared electron number for the pair | 32 c - 58 c =   | 1.3504 |
| shared electron number for the pair | 32 c - 59 c =   | 0.0477 |
| shared electron number for the pair | 32 c - 76 h =   | 0.0343 |
| shared electron number for the pair | 32 c - 77 h =   | 0.0260 |
| shared electron number for the pair | 33 c - 58 c =   | 0.0493 |
| shared electron number for the pair | 33 c - 59 c =   | 1.3461 |
| shared electron number for the pair | 33 c - 60 h =   | 1.3512 |
| shared electron number for the pair | 33 c - 61 h =   | 1.3641 |
| shared electron number for the pair | 33 c - 78 h =   | 0.0328 |
| shared electron number for the pair | 33 c - 79 h =   | 0.0252 |



|                                     |                 |        |
|-------------------------------------|-----------------|--------|
| shared electron number for the pair | 34 h - 35 h =   | 0.0230 |
| shared electron number for the pair | 34 h - 36 h =   | 0.0232 |
| shared electron number for the pair | 35 h - 36 h =   | 0.0229 |
| shared electron number for the pair | 37 h - 38 h =   | 0.0226 |
| shared electron number for the pair | 37 h - 39 h =   | 0.0230 |
| shared electron number for the pair | 38 h - 39 h =   | 0.0234 |
| shared electron number for the pair | 40 h - 41 h =   | 0.0235 |
| shared electron number for the pair | 40 h - 42 h =   | 0.0233 |
| shared electron number for the pair | 41 h - 42 h =   | 0.0230 |
| shared electron number for the pair | 43 h - 44 h =   | 0.0230 |
| shared electron number for the pair | 43 h - 45 h =   | 0.0230 |
| shared electron number for the pair | 44 h - 45 h =   | 0.0231 |
| shared electron number for the pair | 46 h - 47 h =   | 0.0232 |
| shared electron number for the pair | 46 h - 48 h =   | 0.0232 |
| shared electron number for the pair | 47 h - 48 h =   | 0.0235 |
| shared electron number for the pair | 49 h - 50 h =   | 0.0235 |
| shared electron number for the pair | 49 h - 51 h =   | 0.0231 |
| shared electron number for the pair | 50 h - 51 h =   | 0.0230 |
| shared electron number for the pair | 52 si - 53 si = | 0.0228 |
| shared electron number for the pair | 52 si - 54 si = | 0.0236 |
| shared electron number for the pair | 52 si - 62 c =  | 1.3807 |
| shared electron number for the pair | 52 si - 63 c =  | 1.3704 |
| shared electron number for the pair | 52 si - 64 c =  | 1.3808 |
| shared electron number for the pair | 52 si - 80 h =  | 0.0303 |
| shared electron number for the pair | 52 si - 81 h =  | 0.0349 |
| shared electron number for the pair | 52 si - 82 h =  | 0.0353 |
| shared electron number for the pair | 52 si - 83 h =  | 0.0320 |
| shared electron number for the pair | 52 si - 84 h =  | 0.0389 |
| shared electron number for the pair | 52 si - 85 h =  | 0.0367 |
| shared electron number for the pair | 52 si - 86 h =  | 0.0365 |
| shared electron number for the pair | 52 si - 87 h =  | 0.0351 |
| shared electron number for the pair | 52 si - 88 h =  | 0.0322 |
| shared electron number for the pair | 53 si - 54 si = | 0.0213 |
| shared electron number for the pair | 53 si - 65 c =  | 1.3656 |
| shared electron number for the pair | 53 si - 66 c =  | 1.3697 |
| shared electron number for the pair | 53 si - 67 c =  | 1.3785 |
| shared electron number for the pair | 53 si - 89 h =  | 0.0363 |
| shared electron number for the pair | 53 si - 90 h =  | 0.0357 |
| shared electron number for the pair | 53 si - 91 h =  | 0.0310 |
| shared electron number for the pair | 53 si - 92 h =  | 0.0312 |
| shared electron number for the pair | 53 si - 93 h =  | 0.0366 |
| shared electron number for the pair | 53 si - 94 h =  | 0.0364 |
| shared electron number for the pair | 53 si - 95 h =  | 0.0368 |
| shared electron number for the pair | 53 si - 96 h =  | 0.0368 |
| shared electron number for the pair | 53 si - 97 h =  | 0.0328 |
| shared electron number for the pair | 54 si - 68 c =  | 1.3724 |
| shared electron number for the pair | 54 si - 69 c =  | 1.3732 |
| shared electron number for the pair | 54 si - 70 c =  | 1.3773 |

|                                     |                 |        |
|-------------------------------------|-----------------|--------|
| shared electron number for the pair | 54 si - 98 h =  | 0.0350 |
| shared electron number for the pair | 54 si - 99 h =  | 0.0338 |
| shared electron number for the pair | 54 si - 100 h = | 0.0310 |
| shared electron number for the pair | 54 si - 101 h = | 0.0316 |
| shared electron number for the pair | 54 si - 102 h = | 0.0339 |
| shared electron number for the pair | 54 si - 103 h = | 0.0351 |
| shared electron number for the pair | 54 si - 104 h = | 0.0362 |
| shared electron number for the pair | 54 si - 105 h = | 0.0357 |
| shared electron number for the pair | 54 si - 106 h = | 0.0316 |
| shared electron number for the pair | 55 c - 56 c =   | 0.0265 |
| shared electron number for the pair | 55 c - 71 h =   | 1.3440 |
| shared electron number for the pair | 55 c - 72 c =   | 1.3505 |
| shared electron number for the pair | 55 c - 73 c =   | 0.0474 |
| shared electron number for the pair | 55 c - 107 h =  | 0.0345 |
| shared electron number for the pair | 55 c - 108 h =  | 0.0259 |
| shared electron number for the pair | 56 c - 72 c =   | 0.0491 |
| shared electron number for the pair | 56 c - 73 c =   | 1.3459 |
| shared electron number for the pair | 56 c - 74 h =   | 1.3513 |
| shared electron number for the pair | 56 c - 75 h =   | 1.3643 |
| shared electron number for the pair | 56 c - 109 h =  | 0.0329 |
| shared electron number for the pair | 56 c - 110 h =  | 0.0252 |
| shared electron number for the pair | 57 h - 58 c =   | 0.0187 |
| shared electron number for the pair | 58 c - 59 c =   | 1.3491 |
| shared electron number for the pair | 58 c - 76 h =   | 1.3767 |
| shared electron number for the pair | 58 c - 77 h =   | 1.3746 |
| shared electron number for the pair | 58 c - 78 h =   | 0.0286 |
| shared electron number for the pair | 58 c - 79 h =   | 0.0230 |
| shared electron number for the pair | 59 c - 60 h =   | 0.0201 |
| shared electron number for the pair | 59 c - 61 h =   | 0.0226 |
| shared electron number for the pair | 59 c - 76 h =   | 0.0281 |
| shared electron number for the pair | 59 c - 77 h =   | 0.0238 |
| shared electron number for the pair | 59 c - 78 h =   | 1.3804 |
| shared electron number for the pair | 59 c - 79 h =   | 1.3747 |
| shared electron number for the pair | 60 h - 61 h =   | 0.0184 |
| shared electron number for the pair | 62 c - 80 h =   | 1.3719 |
| shared electron number for the pair | 62 c - 81 h =   | 1.3937 |
| shared electron number for the pair | 62 c - 82 h =   | 1.3974 |
| shared electron number for the pair | 63 c - 83 h =   | 1.3863 |
| shared electron number for the pair | 63 c - 84 h =   | 1.3794 |
| shared electron number for the pair | 63 c - 85 h =   | 1.3916 |
| shared electron number for the pair | 64 c - 86 h =   | 1.3894 |
| shared electron number for the pair | 64 c - 87 h =   | 1.3911 |
| shared electron number for the pair | 64 c - 88 h =   | 1.3773 |
| shared electron number for the pair | 65 c - 89 h =   | 1.3946 |
| shared electron number for the pair | 65 c - 90 h =   | 1.3955 |
| shared electron number for the pair | 65 c - 91 h =   | 1.3724 |
| shared electron number for the pair | 66 c - 92 h =   | 1.3735 |
| shared electron number for the pair | 66 c - 93 h =   | 1.3930 |

|                                     |                |        |
|-------------------------------------|----------------|--------|
| shared electron number for the pair | 66 c - 94 h =  | 1.3970 |
| shared electron number for the pair | 67 c - 95 h =  | 1.3903 |
| shared electron number for the pair | 67 c - 96 h =  | 1.3938 |
| shared electron number for the pair | 67 c - 97 h =  | 1.3736 |
| shared electron number for the pair | 68 c - 98 h =  | 1.3965 |
| shared electron number for the pair | 68 c - 99 h =  | 1.3853 |
| shared electron number for the pair | 68 c - 100 h = | 1.3741 |
| shared electron number for the pair | 69 c - 101 h = | 1.3761 |
| shared electron number for the pair | 69 c - 102 h = | 1.3778 |
| shared electron number for the pair | 69 c - 103 h = | 1.3949 |
| shared electron number for the pair | 70 c - 104 h = | 1.3935 |
| shared electron number for the pair | 70 c - 105 h = | 1.3977 |
| shared electron number for the pair | 70 c - 106 h = | 1.3691 |
| shared electron number for the pair | 71 h - 72 c =  | 0.0187 |
| shared electron number for the pair | 72 c - 73 c =  | 1.3489 |
| shared electron number for the pair | 72 c - 107 h = | 1.3765 |
| shared electron number for the pair | 72 c - 108 h = | 1.3746 |
| shared electron number for the pair | 72 c - 109 h = | 0.0286 |
| shared electron number for the pair | 72 c - 110 h = | 0.0230 |
| shared electron number for the pair | 73 c - 74 h =  | 0.0200 |
| shared electron number for the pair | 73 c - 75 h =  | 0.0225 |
| shared electron number for the pair | 73 c - 107 h = | 0.0281 |
| shared electron number for the pair | 73 c - 108 h = | 0.0238 |
| shared electron number for the pair | 73 c - 109 h = | 1.3804 |
| shared electron number for the pair | 73 c - 110 h = | 1.3749 |
| shared electron number for the pair | 74 h - 75 h =  | 0.0183 |
| shared electron number for the pair | 76 h - 77 h =  | 0.0231 |
| shared electron number for the pair | 78 h - 79 h =  | 0.0228 |
| shared electron number for the pair | 80 h - 81 h =  | 0.0229 |
| shared electron number for the pair | 80 h - 82 h =  | 0.0228 |
| shared electron number for the pair | 81 h - 82 h =  | 0.0231 |
| shared electron number for the pair | 83 h - 84 h =  | 0.0228 |
| shared electron number for the pair | 83 h - 85 h =  | 0.0223 |
| shared electron number for the pair | 84 h - 85 h =  | 0.0236 |
| shared electron number for the pair | 86 h - 87 h =  | 0.0236 |
| shared electron number for the pair | 86 h - 88 h =  | 0.0230 |
| shared electron number for the pair | 87 h - 88 h =  | 0.0232 |
| shared electron number for the pair | 89 h - 90 h =  | 0.0230 |
| shared electron number for the pair | 89 h - 91 h =  | 0.0232 |
| shared electron number for the pair | 90 h - 91 h =  | 0.0230 |
| shared electron number for the pair | 92 h - 93 h =  | 0.0225 |
| shared electron number for the pair | 92 h - 94 h =  | 0.0230 |
| shared electron number for the pair | 93 h - 94 h =  | 0.0234 |
| shared electron number for the pair | 95 h - 96 h =  | 0.0235 |
| shared electron number for the pair | 95 h - 97 h =  | 0.0234 |
| shared electron number for the pair | 96 h - 97 h =  | 0.0230 |
| shared electron number for the pair | 98 h - 99 h =  | 0.0230 |
| shared electron number for the pair | 98 h - 100 h = | 0.0230 |

|                                     |                 |        |
|-------------------------------------|-----------------|--------|
| shared electron number for the pair | 99 h - 100 h =  | 0.0231 |
| shared electron number for the pair | 101 h - 102 h = | 0.0232 |
| shared electron number for the pair | 101 h - 103 h = | 0.0232 |
| shared electron number for the pair | 102 h - 103 h = | 0.0235 |
| shared electron number for the pair | 104 h - 105 h = | 0.0235 |
| shared electron number for the pair | 104 h - 106 h = | 0.0231 |
| shared electron number for the pair | 105 h - 106 h = | 0.0230 |
| shared electron number for the pair | 107 h - 108 h = | 0.0231 |
| shared electron number for the pair | 109 h - 110 h = | 0.0228 |

### 3b:

|                                     |                |        |
|-------------------------------------|----------------|--------|
| shared electron number for the pair | 1 c - 2 h =    | 1.3889 |
| shared electron number for the pair | 1 c - 3 h =    | 1.3918 |
| shared electron number for the pair | 1 c - 4 h =    | 1.3774 |
| shared electron number for the pair | 1 c - 5 si =   | 1.3866 |
| shared electron number for the pair | 2 h - 3 h =    | 0.0235 |
| shared electron number for the pair | 2 h - 4 h =    | 0.0229 |
| shared electron number for the pair | 2 h - 5 si =   | 0.0357 |
| shared electron number for the pair | 3 h - 4 h =    | 0.0231 |
| shared electron number for the pair | 3 h - 5 si =   | 0.0356 |
| shared electron number for the pair | 4 h - 5 si =   | 0.0322 |
| shared electron number for the pair | 5 si - 6 si =  | 1.3395 |
| shared electron number for the pair | 5 si - 7 c =   | 1.3849 |
| shared electron number for the pair | 5 si - 8 c =   | 1.3680 |
| shared electron number for the pair | 5 si - 9 be =  | 0.0337 |
| shared electron number for the pair | 5 si - 10 si = | 0.0222 |
| shared electron number for the pair | 5 si - 11 si = | 0.0228 |
| shared electron number for the pair | 5 si - 12 h =  | 0.0305 |
| shared electron number for the pair | 5 si - 13 h =  | 0.0352 |
| shared electron number for the pair | 5 si - 14 h =  | 0.0351 |
| shared electron number for the pair | 5 si - 15 h =  | 0.0321 |
| shared electron number for the pair | 5 si - 16 h =  | 0.0387 |
| shared electron number for the pair | 5 si - 17 h =  | 0.0365 |
| shared electron number for the pair | 6 si - 9 be =  | 1.3609 |
| shared electron number for the pair | 6 si - 10 si = | 1.3441 |
| shared electron number for the pair | 6 si - 11 si = | 1.3343 |
| shared electron number for the pair | 7 c - 12 h =   | 1.3714 |
| shared electron number for the pair | 7 c - 13 h =   | 1.3927 |
| shared electron number for the pair | 7 c - 14 h =   | 1.3962 |
| shared electron number for the pair | 8 c - 9 be =   | 0.0104 |
| shared electron number for the pair | 8 c - 15 h =   | 1.3849 |
| shared electron number for the pair | 8 c - 16 h =   | 1.3865 |
| shared electron number for the pair | 8 c - 17 h =   | 1.3934 |
| shared electron number for the pair | 9 be - 10 si = | 0.0150 |
| shared electron number for the pair | 9 be - 11 si = | 0.0203 |
| shared electron number for the pair | 9 be - 18 br = | 0.0987 |

|                                     |                 |        |
|-------------------------------------|-----------------|--------|
| shared electron number for the pair | 9 be - 19 br =  | 0.0832 |
| shared electron number for the pair | 9 be - 21 o =   | 0.6033 |
| shared electron number for the pair | 9 be - 22 h =   | 0.0177 |
| shared electron number for the pair | 9 be - 32 c =   | 0.0560 |
| shared electron number for the pair | 9 be - 33 c =   | 0.0686 |
| shared electron number for the pair | 9 be - 58 c =   | 0.0133 |
| shared electron number for the pair | 9 be - 59 c =   | 0.0106 |
| shared electron number for the pair | 9 be - 60 h =   | 0.0242 |
| shared electron number for the pair | 9 be - 61 h =   | 0.0121 |
| shared electron number for the pair | 10 si - 11 si = | 0.0209 |
| shared electron number for the pair | 10 si - 23 c =  | 1.3659 |
| shared electron number for the pair | 10 si - 24 c =  | 1.3702 |
| shared electron number for the pair | 10 si - 25 c =  | 1.3798 |
| shared electron number for the pair | 10 si - 34 h =  | 0.0365 |
| shared electron number for the pair | 10 si - 35 h =  | 0.0356 |
| shared electron number for the pair | 10 si - 36 h =  | 0.0313 |
| shared electron number for the pair | 10 si - 37 h =  | 0.0316 |
| shared electron number for the pair | 10 si - 38 h =  | 0.0366 |
| shared electron number for the pair | 10 si - 39 h =  | 0.0365 |
| shared electron number for the pair | 10 si - 40 h =  | 0.0369 |
| shared electron number for the pair | 10 si - 41 h =  | 0.0372 |
| shared electron number for the pair | 10 si - 42 h =  | 0.0328 |
| shared electron number for the pair | 11 si - 26 c =  | 1.3736 |
| shared electron number for the pair | 11 si - 27 c =  | 1.3745 |
| shared electron number for the pair | 11 si - 28 c =  | 1.3763 |
| shared electron number for the pair | 11 si - 43 h =  | 0.0349 |
| shared electron number for the pair | 11 si - 44 h =  | 0.0342 |
| shared electron number for the pair | 11 si - 45 h =  | 0.0307 |
| shared electron number for the pair | 11 si - 46 h =  | 0.0316 |
| shared electron number for the pair | 11 si - 47 h =  | 0.0341 |
| shared electron number for the pair | 11 si - 48 h =  | 0.0351 |
| shared electron number for the pair | 11 si - 49 h =  | 0.0361 |
| shared electron number for the pair | 11 si - 50 h =  | 0.0356 |
| shared electron number for the pair | 11 si - 51 h =  | 0.0318 |
| shared electron number for the pair | 12 h - 13 h =   | 0.0230 |
| shared electron number for the pair | 12 h - 14 h =   | 0.0228 |
| shared electron number for the pair | 13 h - 14 h =   | 0.0231 |
| shared electron number for the pair | 15 h - 16 h =   | 0.0231 |
| shared electron number for the pair | 15 h - 17 h =   | 0.0222 |
| shared electron number for the pair | 16 h - 17 h =   | 0.0238 |
| shared electron number for the pair | 18 br - 20 be = | 0.0834 |
| shared electron number for the pair | 19 br - 20 be = | 0.0991 |
| shared electron number for the pair | 20 be - 29 si = | 1.3609 |
| shared electron number for the pair | 20 be - 30 o =  | 0.6020 |
| shared electron number for the pair | 20 be - 31 h =  | 0.0177 |
| shared electron number for the pair | 20 be - 52 si = | 0.0337 |
| shared electron number for the pair | 20 be - 53 si = | 0.0149 |
| shared electron number for the pair | 20 be - 54 si = | 0.0202 |

|                                     |                 |        |
|-------------------------------------|-----------------|--------|
| shared electron number for the pair | 20 be - 55 c =  | 0.0560 |
| shared electron number for the pair | 20 be - 56 c =  | 0.0686 |
| shared electron number for the pair | 20 be - 63 c =  | 0.0104 |
| shared electron number for the pair | 20 be - 72 c =  | 0.0134 |
| shared electron number for the pair | 20 be - 73 c =  | 0.0106 |
| shared electron number for the pair | 20 be - 74 h =  | 0.0243 |
| shared electron number for the pair | 20 be - 75 h =  | 0.0121 |
| shared electron number for the pair | 21 o - 32 c =   | 1.0110 |
| shared electron number for the pair | 21 o - 33 c =   | 1.0184 |
| shared electron number for the pair | 22 h - 32 c =   | 1.3670 |
| shared electron number for the pair | 22 h - 57 h =   | 0.0186 |
| shared electron number for the pair | 22 h - 58 c =   | 0.0238 |
| shared electron number for the pair | 23 c - 34 h =   | 1.3929 |
| shared electron number for the pair | 23 c - 35 h =   | 1.3957 |
| shared electron number for the pair | 23 c - 36 h =   | 1.3716 |
| shared electron number for the pair | 24 c - 37 h =   | 1.3718 |
| shared electron number for the pair | 24 c - 38 h =   | 1.3920 |
| shared electron number for the pair | 24 c - 39 h =   | 1.3986 |
| shared electron number for the pair | 25 c - 40 h =   | 1.3907 |
| shared electron number for the pair | 25 c - 41 h =   | 1.3941 |
| shared electron number for the pair | 25 c - 42 h =   | 1.3724 |
| shared electron number for the pair | 26 c - 43 h =   | 1.3963 |
| shared electron number for the pair | 26 c - 44 h =   | 1.3845 |
| shared electron number for the pair | 26 c - 45 h =   | 1.3745 |
| shared electron number for the pair | 27 c - 46 h =   | 1.3768 |
| shared electron number for the pair | 27 c - 47 h =   | 1.3767 |
| shared electron number for the pair | 27 c - 48 h =   | 1.3953 |
| shared electron number for the pair | 28 c - 49 h =   | 1.3931 |
| shared electron number for the pair | 28 c - 50 h =   | 1.3976 |
| shared electron number for the pair | 28 c - 51 h =   | 1.3699 |
| shared electron number for the pair | 29 si - 52 si = | 1.3394 |
| shared electron number for the pair | 29 si - 53 si = | 1.3441 |
| shared electron number for the pair | 29 si - 54 si = | 1.3342 |
| shared electron number for the pair | 30 o - 55 c =   | 1.0111 |
| shared electron number for the pair | 30 o - 56 c =   | 1.0183 |
| shared electron number for the pair | 31 h - 55 c =   | 1.3669 |
| shared electron number for the pair | 31 h - 71 h =   | 0.0186 |
| shared electron number for the pair | 31 h - 72 c =   | 0.0238 |
| shared electron number for the pair | 32 c - 33 c =   | 0.0249 |
| shared electron number for the pair | 32 c - 57 h =   | 1.3465 |
| shared electron number for the pair | 32 c - 58 c =   | 1.3514 |
| shared electron number for the pair | 32 c - 59 c =   | 0.0462 |
| shared electron number for the pair | 32 c - 76 h =   | 0.0353 |
| shared electron number for the pair | 32 c - 77 h =   | 0.0258 |
| shared electron number for the pair | 33 c - 58 c =   | 0.0491 |
| shared electron number for the pair | 33 c - 59 c =   | 1.3462 |
| shared electron number for the pair | 33 c - 60 h =   | 1.3494 |
| shared electron number for the pair | 33 c - 61 h =   | 1.3628 |

|                                     |                 |        |
|-------------------------------------|-----------------|--------|
| shared electron number for the pair | 33 c - 78 h =   | 0.0332 |
| shared electron number for the pair | 33 c - 79 h =   | 0.0252 |
| shared electron number for the pair | 34 h - 35 h =   | 0.0228 |
| shared electron number for the pair | 34 h - 36 h =   | 0.0230 |
| shared electron number for the pair | 35 h - 36 h =   | 0.0230 |
| shared electron number for the pair | 37 h - 38 h =   | 0.0228 |
| shared electron number for the pair | 37 h - 39 h =   | 0.0231 |
| shared electron number for the pair | 38 h - 39 h =   | 0.0234 |
| shared electron number for the pair | 40 h - 41 h =   | 0.0234 |
| shared electron number for the pair | 40 h - 42 h =   | 0.0233 |
| shared electron number for the pair | 41 h - 42 h =   | 0.0230 |
| shared electron number for the pair | 43 h - 44 h =   | 0.0230 |
| shared electron number for the pair | 43 h - 45 h =   | 0.0229 |
| shared electron number for the pair | 44 h - 45 h =   | 0.0231 |
| shared electron number for the pair | 46 h - 47 h =   | 0.0232 |
| shared electron number for the pair | 46 h - 48 h =   | 0.0233 |
| shared electron number for the pair | 47 h - 48 h =   | 0.0236 |
| shared electron number for the pair | 49 h - 50 h =   | 0.0234 |
| shared electron number for the pair | 49 h - 51 h =   | 0.0231 |
| shared electron number for the pair | 50 h - 51 h =   | 0.0230 |
| shared electron number for the pair | 52 si - 53 si = | 0.0222 |
| shared electron number for the pair | 52 si - 54 si = | 0.0228 |
| shared electron number for the pair | 52 si - 62 c =  | 1.3849 |
| shared electron number for the pair | 52 si - 63 c =  | 1.3680 |
| shared electron number for the pair | 52 si - 64 c =  | 1.3866 |
| shared electron number for the pair | 52 si - 80 h =  | 0.0305 |
| shared electron number for the pair | 52 si - 81 h =  | 0.0352 |
| shared electron number for the pair | 52 si - 82 h =  | 0.0351 |
| shared electron number for the pair | 52 si - 83 h =  | 0.0322 |
| shared electron number for the pair | 52 si - 84 h =  | 0.0387 |
| shared electron number for the pair | 52 si - 85 h =  | 0.0365 |
| shared electron number for the pair | 52 si - 86 h =  | 0.0357 |
| shared electron number for the pair | 52 si - 87 h =  | 0.0356 |
| shared electron number for the pair | 52 si - 88 h =  | 0.0322 |
| shared electron number for the pair | 53 si - 54 si = | 0.0209 |
| shared electron number for the pair | 53 si - 65 c =  | 1.3660 |
| shared electron number for the pair | 53 si - 66 c =  | 1.3702 |
| shared electron number for the pair | 53 si - 67 c =  | 1.3797 |
| shared electron number for the pair | 53 si - 89 h =  | 0.0365 |
| shared electron number for the pair | 53 si - 90 h =  | 0.0356 |
| shared electron number for the pair | 53 si - 91 h =  | 0.0313 |
| shared electron number for the pair | 53 si - 92 h =  | 0.0316 |
| shared electron number for the pair | 53 si - 93 h =  | 0.0366 |
| shared electron number for the pair | 53 si - 94 h =  | 0.0365 |
| shared electron number for the pair | 53 si - 95 h =  | 0.0369 |
| shared electron number for the pair | 53 si - 96 h =  | 0.0372 |
| shared electron number for the pair | 53 si - 97 h =  | 0.0328 |
| shared electron number for the pair | 54 si - 68 c =  | 1.3735 |

|                                     |                 |        |
|-------------------------------------|-----------------|--------|
| shared electron number for the pair | 54 si - 69 c =  | 1.3745 |
| shared electron number for the pair | 54 si - 70 c =  | 1.3766 |
| shared electron number for the pair | 54 si - 98 h =  | 0.0349 |
| shared electron number for the pair | 54 si - 99 h =  | 0.0342 |
| shared electron number for the pair | 54 si - 100 h = | 0.0307 |
| shared electron number for the pair | 54 si - 101 h = | 0.0316 |
| shared electron number for the pair | 54 si - 102 h = | 0.0340 |
| shared electron number for the pair | 54 si - 103 h = | 0.0351 |
| shared electron number for the pair | 54 si - 104 h = | 0.0361 |
| shared electron number for the pair | 54 si - 105 h = | 0.0355 |
| shared electron number for the pair | 54 si - 106 h = | 0.0318 |
| shared electron number for the pair | 55 c - 56 c =   | 0.0250 |
| shared electron number for the pair | 55 c - 71 h =   | 1.3464 |
| shared electron number for the pair | 55 c - 72 c =   | 1.3514 |
| shared electron number for the pair | 55 c - 73 c =   | 0.0463 |
| shared electron number for the pair | 55 c - 107 h =  | 0.0353 |
| shared electron number for the pair | 55 c - 108 h =  | 0.0258 |
| shared electron number for the pair | 56 c - 72 c =   | 0.0490 |
| shared electron number for the pair | 56 c - 73 c =   | 1.3463 |
| shared electron number for the pair | 56 c - 74 h =   | 1.3494 |
| shared electron number for the pair | 56 c - 75 h =   | 1.3629 |
| shared electron number for the pair | 56 c - 109 h =  | 0.0331 |
| shared electron number for the pair | 56 c - 110 h =  | 0.0252 |
| shared electron number for the pair | 57 h - 58 c =   | 0.0186 |
| shared electron number for the pair | 58 c - 59 c =   | 1.3470 |
| shared electron number for the pair | 58 c - 76 h =   | 1.3744 |
| shared electron number for the pair | 58 c - 77 h =   | 1.3751 |
| shared electron number for the pair | 58 c - 78 h =   | 0.0284 |
| shared electron number for the pair | 58 c - 79 h =   | 0.0227 |
| shared electron number for the pair | 59 c - 60 h =   | 0.0198 |
| shared electron number for the pair | 59 c - 61 h =   | 0.0225 |
| shared electron number for the pair | 59 c - 76 h =   | 0.0280 |
| shared electron number for the pair | 59 c - 77 h =   | 0.0233 |
| shared electron number for the pair | 59 c - 78 h =   | 1.3791 |
| shared electron number for the pair | 59 c - 79 h =   | 1.3756 |
| shared electron number for the pair | 60 h - 61 h =   | 0.0181 |
| shared electron number for the pair | 62 c - 80 h =   | 1.3714 |
| shared electron number for the pair | 62 c - 81 h =   | 1.3927 |
| shared electron number for the pair | 62 c - 82 h =   | 1.3962 |
| shared electron number for the pair | 63 c - 83 h =   | 1.3849 |
| shared electron number for the pair | 63 c - 84 h =   | 1.3864 |
| shared electron number for the pair | 63 c - 85 h =   | 1.3933 |
| shared electron number for the pair | 64 c - 86 h =   | 1.3890 |
| shared electron number for the pair | 64 c - 87 h =   | 1.3918 |
| shared electron number for the pair | 64 c - 88 h =   | 1.3774 |
| shared electron number for the pair | 65 c - 89 h =   | 1.3930 |
| shared electron number for the pair | 65 c - 90 h =   | 1.3957 |
| shared electron number for the pair | 65 c - 91 h =   | 1.3715 |



|                                     |                |        |
|-------------------------------------|----------------|--------|
| shared electron number for the pair | 66 c - 92 h =  | 1.3718 |
| shared electron number for the pair | 66 c - 93 h =  | 1.3920 |
| shared electron number for the pair | 66 c - 94 h =  | 1.3985 |
| shared electron number for the pair | 67 c - 95 h =  | 1.3907 |
| shared electron number for the pair | 67 c - 96 h =  | 1.3941 |
| shared electron number for the pair | 67 c - 97 h =  | 1.3724 |
| shared electron number for the pair | 68 c - 98 h =  | 1.3963 |
| shared electron number for the pair | 68 c - 99 h =  | 1.3847 |
| shared electron number for the pair | 68 c - 100 h = | 1.3745 |
| shared electron number for the pair | 69 c - 101 h = | 1.3767 |
| shared electron number for the pair | 69 c - 102 h = | 1.3766 |
| shared electron number for the pair | 69 c - 103 h = | 1.3953 |
| shared electron number for the pair | 70 c - 104 h = | 1.3931 |
| shared electron number for the pair | 70 c - 105 h = | 1.3976 |
| shared electron number for the pair | 70 c - 106 h = | 1.3699 |
| shared electron number for the pair | 71 h - 72 c =  | 0.0186 |
| shared electron number for the pair | 72 c - 73 c =  | 1.3470 |
| shared electron number for the pair | 72 c - 107 h = | 1.3743 |
| shared electron number for the pair | 72 c - 108 h = | 1.3751 |
| shared electron number for the pair | 72 c - 109 h = | 0.0284 |
| shared electron number for the pair | 72 c - 110 h = | 0.0227 |
| shared electron number for the pair | 73 c - 74 h =  | 0.0199 |
| shared electron number for the pair | 73 c - 75 h =  | 0.0225 |
| shared electron number for the pair | 73 c - 107 h = | 0.0280 |
| shared electron number for the pair | 73 c - 108 h = | 0.0234 |
| shared electron number for the pair | 73 c - 109 h = | 1.3791 |
| shared electron number for the pair | 73 c - 110 h = | 1.3755 |
| shared electron number for the pair | 74 h - 75 h =  | 0.0181 |
| shared electron number for the pair | 76 h - 77 h =  | 0.0231 |
| shared electron number for the pair | 78 h - 79 h =  | 0.0228 |
| shared electron number for the pair | 80 h - 81 h =  | 0.0230 |
| shared electron number for the pair | 80 h - 82 h =  | 0.0228 |
| shared electron number for the pair | 81 h - 82 h =  | 0.0231 |
| shared electron number for the pair | 83 h - 84 h =  | 0.0231 |
| shared electron number for the pair | 83 h - 85 h =  | 0.0222 |
| shared electron number for the pair | 84 h - 85 h =  | 0.0238 |
| shared electron number for the pair | 86 h - 87 h =  | 0.0235 |
| shared electron number for the pair | 86 h - 88 h =  | 0.0229 |
| shared electron number for the pair | 87 h - 88 h =  | 0.0231 |
| shared electron number for the pair | 89 h - 90 h =  | 0.0228 |
| shared electron number for the pair | 89 h - 91 h =  | 0.0230 |
| shared electron number for the pair | 90 h - 91 h =  | 0.0230 |
| shared electron number for the pair | 92 h - 93 h =  | 0.0228 |
| shared electron number for the pair | 92 h - 94 h =  | 0.0231 |
| shared electron number for the pair | 93 h - 94 h =  | 0.0234 |
| shared electron number for the pair | 95 h - 96 h =  | 0.0234 |
| shared electron number for the pair | 95 h - 97 h =  | 0.0233 |
| shared electron number for the pair | 96 h - 97 h =  | 0.0230 |

|                                     |                 |        |
|-------------------------------------|-----------------|--------|
| shared electron number for the pair | 98 h - 99 h =   | 0.0230 |
| shared electron number for the pair | 98 h - 100 h =  | 0.0229 |
| shared electron number for the pair | 99 h - 100 h =  | 0.0231 |
| shared electron number for the pair | 101 h - 102 h = | 0.0232 |
| shared electron number for the pair | 101 h - 103 h = | 0.0233 |
| shared electron number for the pair | 102 h - 103 h = | 0.0236 |
| shared electron number for the pair | 104 h - 105 h = | 0.0234 |
| shared electron number for the pair | 104 h - 106 h = | 0.0231 |
| shared electron number for the pair | 105 h - 106 h = | 0.0230 |
| shared electron number for the pair | 107 h - 108 h = | 0.0231 |
| shared electron number for the pair | 109 h - 110 h = | 0.0228 |

#### 4b:

|                                     |                |        |
|-------------------------------------|----------------|--------|
| shared electron number for the pair | 1 c - 2 h =    | 1.3887 |
| shared electron number for the pair | 1 c - 3 h =    | 1.3937 |
| shared electron number for the pair | 1 c - 4 h =    | 1.3773 |
| shared electron number for the pair | 1 c - 5 si =   | 1.3806 |
| shared electron number for the pair | 2 h - 3 h =    | 0.0235 |
| shared electron number for the pair | 2 h - 4 h =    | 0.0229 |
| shared electron number for the pair | 2 h - 5 si =   | 0.0355 |
| shared electron number for the pair | 3 h - 4 h =    | 0.0231 |
| shared electron number for the pair | 3 h - 5 si =   | 0.0358 |
| shared electron number for the pair | 4 h - 5 si =   | 0.0324 |
| shared electron number for the pair | 5 si - 6 si =  | 1.3388 |
| shared electron number for the pair | 5 si - 7 c =   | 1.3870 |
| shared electron number for the pair | 5 si - 8 c =   | 1.3688 |
| shared electron number for the pair | 5 si - 9 be =  | 0.0352 |
| shared electron number for the pair | 5 si - 10 si = | 0.0216 |
| shared electron number for the pair | 5 si - 11 si = | 0.0221 |
| shared electron number for the pair | 5 si - 12 h =  | 0.0311 |
| shared electron number for the pair | 5 si - 13 h =  | 0.0349 |
| shared electron number for the pair | 5 si - 14 h =  | 0.0360 |
| shared electron number for the pair | 5 si - 15 h =  | 0.0320 |
| shared electron number for the pair | 5 si - 16 h =  | 0.0384 |
| shared electron number for the pair | 5 si - 17 h =  | 0.0359 |
| shared electron number for the pair | 6 si - 9 be =  | 1.3139 |
| shared electron number for the pair | 6 si - 10 si = | 1.3398 |
| shared electron number for the pair | 6 si - 11 si = | 1.3296 |
| shared electron number for the pair | 7 c - 12 h =   | 1.3725 |
| shared electron number for the pair | 7 c - 13 h =   | 1.3935 |
| shared electron number for the pair | 7 c - 14 h =   | 1.3910 |
| shared electron number for the pair | 8 c - 15 h =   | 1.3821 |
| shared electron number for the pair | 8 c - 16 h =   | 1.3867 |
| shared electron number for the pair | 8 c - 17 h =   | 1.3961 |
| shared electron number for the pair | 9 be - 10 si = | 0.0110 |
| shared electron number for the pair | 9 be - 11 si = | 0.0189 |

|                                     |                 |        |
|-------------------------------------|-----------------|--------|
| shared electron number for the pair | 9 be - 18 i =   | 0.0553 |
| shared electron number for the pair | 9 be - 19 i =   | 0.0569 |
| shared electron number for the pair | 9 be - 21 o =   | 0.8026 |
| shared electron number for the pair | 9 be - 22 h =   | 0.0196 |
| shared electron number for the pair | 9 be - 32 c =   | 0.0602 |
| shared electron number for the pair | 9 be - 33 c =   | 0.0725 |
| shared electron number for the pair | 9 be - 57 h =   | 0.0108 |
| shared electron number for the pair | 9 be - 58 c =   | 0.0133 |
| shared electron number for the pair | 9 be - 59 c =   | 0.0108 |
| shared electron number for the pair | 9 be - 60 h =   | 0.0225 |
| shared electron number for the pair | 9 be - 61 h =   | 0.0142 |
| shared electron number for the pair | 10 si - 11 si = | 0.0207 |
| shared electron number for the pair | 10 si - 23 c =  | 1.3674 |
| shared electron number for the pair | 10 si - 24 c =  | 1.3700 |
| shared electron number for the pair | 10 si - 25 c =  | 1.3690 |
| shared electron number for the pair | 10 si - 34 h =  | 0.0374 |
| shared electron number for the pair | 10 si - 35 h =  | 0.0353 |
| shared electron number for the pair | 10 si - 36 h =  | 0.0316 |
| shared electron number for the pair | 10 si - 37 h =  | 0.0323 |
| shared electron number for the pair | 10 si - 38 h =  | 0.0360 |
| shared electron number for the pair | 10 si - 39 h =  | 0.0376 |
| shared electron number for the pair | 10 si - 40 h =  | 0.0373 |
| shared electron number for the pair | 10 si - 41 h =  | 0.0379 |
| shared electron number for the pair | 10 si - 42 h =  | 0.0331 |
| shared electron number for the pair | 11 si - 26 c =  | 1.3774 |
| shared electron number for the pair | 11 si - 27 c =  | 1.3774 |
| shared electron number for the pair | 11 si - 28 c =  | 1.3729 |
| shared electron number for the pair | 11 si - 43 h =  | 0.0344 |
| shared electron number for the pair | 11 si - 44 h =  | 0.0346 |
| shared electron number for the pair | 11 si - 45 h =  | 0.0304 |
| shared electron number for the pair | 11 si - 46 h =  | 0.0318 |
| shared electron number for the pair | 11 si - 47 h =  | 0.0341 |
| shared electron number for the pair | 11 si - 48 h =  | 0.0347 |
| shared electron number for the pair | 11 si - 49 h =  | 0.0360 |
| shared electron number for the pair | 11 si - 50 h =  | 0.0356 |
| shared electron number for the pair | 11 si - 51 h =  | 0.0317 |
| shared electron number for the pair | 12 h - 13 h =   | 0.0231 |
| shared electron number for the pair | 12 h - 14 h =   | 0.0230 |
| shared electron number for the pair | 13 h - 14 h =   | 0.0232 |
| shared electron number for the pair | 15 h - 16 h =   | 0.0231 |
| shared electron number for the pair | 15 h - 17 h =   | 0.0224 |
| shared electron number for the pair | 16 h - 17 h =   | 0.0238 |
| shared electron number for the pair | 18 i - 20 be =  | 0.0570 |
| shared electron number for the pair | 19 i - 20 be =  | 0.0553 |
| shared electron number for the pair | 20 be - 29 si = | 1.3139 |
| shared electron number for the pair | 20 be - 30 o =  | 0.8023 |
| shared electron number for the pair | 20 be - 31 h =  | 0.0196 |
| shared electron number for the pair | 20 be - 52 si = | 0.0352 |

|                                     |                 |        |
|-------------------------------------|-----------------|--------|
| shared electron number for the pair | 20 be - 53 si = | 0.0110 |
| shared electron number for the pair | 20 be - 54 si = | 0.0189 |
| shared electron number for the pair | 20 be - 55 c =  | 0.0602 |
| shared electron number for the pair | 20 be - 56 c =  | 0.0725 |
| shared electron number for the pair | 20 be - 71 h =  | 0.0108 |
| shared electron number for the pair | 20 be - 72 c =  | 0.0133 |
| shared electron number for the pair | 20 be - 73 c =  | 0.0108 |
| shared electron number for the pair | 20 be - 74 h =  | 0.0226 |
| shared electron number for the pair | 20 be - 75 h =  | 0.0142 |
| shared electron number for the pair | 21 o - 32 c =   | 1.0040 |
| shared electron number for the pair | 21 o - 33 c =   | 1.0076 |
| shared electron number for the pair | 22 h - 32 c =   | 1.3659 |
| shared electron number for the pair | 22 h - 57 h =   | 0.0184 |
| shared electron number for the pair | 22 h - 58 c =   | 0.0236 |
| shared electron number for the pair | 23 c - 34 h =   | 1.3905 |
| shared electron number for the pair | 23 c - 35 h =   | 1.3958 |
| shared electron number for the pair | 23 c - 36 h =   | 1.3712 |
| shared electron number for the pair | 24 c - 37 h =   | 1.3727 |
| shared electron number for the pair | 24 c - 38 h =   | 1.3911 |
| shared electron number for the pair | 24 c - 39 h =   | 1.3937 |
| shared electron number for the pair | 25 c - 40 h =   | 1.3910 |
| shared electron number for the pair | 25 c - 41 h =   | 1.3954 |
| shared electron number for the pair | 25 c - 42 h =   | 1.3715 |
| shared electron number for the pair | 26 c - 43 h =   | 1.3966 |
| shared electron number for the pair | 26 c - 44 h =   | 1.3832 |
| shared electron number for the pair | 26 c - 45 h =   | 1.3748 |
| shared electron number for the pair | 27 c - 46 h =   | 1.3775 |
| shared electron number for the pair | 27 c - 47 h =   | 1.3755 |
| shared electron number for the pair | 27 c - 48 h =   | 1.3961 |
| shared electron number for the pair | 28 c - 49 h =   | 1.3921 |
| shared electron number for the pair | 28 c - 50 h =   | 1.3967 |
| shared electron number for the pair | 28 c - 51 h =   | 1.3711 |
| shared electron number for the pair | 29 si - 52 si = | 1.3389 |
| shared electron number for the pair | 29 si - 53 si = | 1.3399 |
| shared electron number for the pair | 29 si - 54 si = | 1.3294 |
| shared electron number for the pair | 30 o - 55 c =   | 1.0041 |
| shared electron number for the pair | 30 o - 56 c =   | 1.0077 |
| shared electron number for the pair | 31 h - 55 c =   | 1.3658 |
| shared electron number for the pair | 31 h - 71 h =   | 0.0184 |
| shared electron number for the pair | 31 h - 72 c =   | 0.0236 |
| shared electron number for the pair | 32 c - 33 c =   | 0.0239 |
| shared electron number for the pair | 32 c - 57 h =   | 1.3470 |
| shared electron number for the pair | 32 c - 58 c =   | 1.3485 |
| shared electron number for the pair | 32 c - 59 c =   | 0.0463 |
| shared electron number for the pair | 32 c - 76 h =   | 0.0360 |
| shared electron number for the pair | 32 c - 77 h =   | 0.0255 |
| shared electron number for the pair | 33 c - 58 c =   | 0.0485 |
| shared electron number for the pair | 33 c - 59 c =   | 1.3448 |

|                                     |                 |        |
|-------------------------------------|-----------------|--------|
| shared electron number for the pair | 33 c - 60 h =   | 1.3480 |
| shared electron number for the pair | 33 c - 61 h =   | 1.3594 |
| shared electron number for the pair | 33 c - 78 h =   | 0.0342 |
| shared electron number for the pair | 33 c - 79 h =   | 0.0250 |
| shared electron number for the pair | 34 h - 35 h =   | 0.0228 |
| shared electron number for the pair | 34 h - 36 h =   | 0.0228 |
| shared electron number for the pair | 35 h - 36 h =   | 0.0230 |
| shared electron number for the pair | 37 h - 38 h =   | 0.0230 |
| shared electron number for the pair | 37 h - 39 h =   | 0.0231 |
| shared electron number for the pair | 38 h - 39 h =   | 0.0235 |
| shared electron number for the pair | 40 h - 41 h =   | 0.0234 |
| shared electron number for the pair | 40 h - 42 h =   | 0.0232 |
| shared electron number for the pair | 41 h - 42 h =   | 0.0230 |
| shared electron number for the pair | 43 h - 44 h =   | 0.0228 |
| shared electron number for the pair | 43 h - 45 h =   | 0.0229 |
| shared electron number for the pair | 44 h - 45 h =   | 0.0231 |
| shared electron number for the pair | 46 h - 47 h =   | 0.0229 |
| shared electron number for the pair | 46 h - 48 h =   | 0.0231 |
| shared electron number for the pair | 47 h - 48 h =   | 0.0235 |
| shared electron number for the pair | 49 h - 50 h =   | 0.0234 |
| shared electron number for the pair | 49 h - 51 h =   | 0.0230 |
| shared electron number for the pair | 50 h - 51 h =   | 0.0230 |
| shared electron number for the pair | 52 si - 53 si = | 0.0216 |
| shared electron number for the pair | 52 si - 54 si = | 0.0221 |
| shared electron number for the pair | 52 si - 62 c =  | 1.3869 |
| shared electron number for the pair | 52 si - 63 c =  | 1.3688 |
| shared electron number for the pair | 52 si - 64 c =  | 1.3805 |
| shared electron number for the pair | 52 si - 80 h =  | 0.0311 |
| shared electron number for the pair | 52 si - 81 h =  | 0.0349 |
| shared electron number for the pair | 52 si - 82 h =  | 0.0360 |
| shared electron number for the pair | 52 si - 83 h =  | 0.0320 |
| shared electron number for the pair | 52 si - 84 h =  | 0.0384 |
| shared electron number for the pair | 52 si - 85 h =  | 0.0359 |
| shared electron number for the pair | 52 si - 86 h =  | 0.0355 |
| shared electron number for the pair | 52 si - 87 h =  | 0.0358 |
| shared electron number for the pair | 52 si - 88 h =  | 0.0324 |
| shared electron number for the pair | 53 si - 54 si = | 0.0207 |
| shared electron number for the pair | 53 si - 65 c =  | 1.3674 |
| shared electron number for the pair | 53 si - 66 c =  | 1.3699 |
| shared electron number for the pair | 53 si - 67 c =  | 1.3690 |
| shared electron number for the pair | 53 si - 89 h =  | 0.0374 |
| shared electron number for the pair | 53 si - 90 h =  | 0.0353 |
| shared electron number for the pair | 53 si - 91 h =  | 0.0316 |
| shared electron number for the pair | 53 si - 92 h =  | 0.0323 |
| shared electron number for the pair | 53 si - 93 h =  | 0.0360 |
| shared electron number for the pair | 53 si - 94 h =  | 0.0376 |
| shared electron number for the pair | 53 si - 95 h =  | 0.0373 |
| shared electron number for the pair | 53 si - 96 h =  | 0.0379 |

|                                     |                 |        |
|-------------------------------------|-----------------|--------|
| shared electron number for the pair | 53 si - 97 h =  | 0.0332 |
| shared electron number for the pair | 54 si - 68 c =  | 1.3773 |
| shared electron number for the pair | 54 si - 69 c =  | 1.3774 |
| shared electron number for the pair | 54 si - 70 c =  | 1.3731 |
| shared electron number for the pair | 54 si - 98 h =  | 0.0344 |
| shared electron number for the pair | 54 si - 99 h =  | 0.0346 |
| shared electron number for the pair | 54 si - 100 h = | 0.0304 |
| shared electron number for the pair | 54 si - 101 h = | 0.0317 |
| shared electron number for the pair | 54 si - 102 h = | 0.0341 |
| shared electron number for the pair | 54 si - 103 h = | 0.0347 |
| shared electron number for the pair | 54 si - 104 h = | 0.0360 |
| shared electron number for the pair | 54 si - 105 h = | 0.0356 |
| shared electron number for the pair | 54 si - 106 h = | 0.0317 |
| shared electron number for the pair | 55 c - 56 c =   | 0.0239 |
| shared electron number for the pair | 55 c - 71 h =   | 1.3469 |
| shared electron number for the pair | 55 c - 72 c =   | 1.3485 |
| shared electron number for the pair | 55 c - 73 c =   | 0.0463 |
| shared electron number for the pair | 55 c - 107 h =  | 0.0360 |
| shared electron number for the pair | 55 c - 108 h =  | 0.0255 |
| shared electron number for the pair | 56 c - 72 c =   | 0.0485 |
| shared electron number for the pair | 56 c - 73 c =   | 1.3448 |
| shared electron number for the pair | 56 c - 74 h =   | 1.3481 |
| shared electron number for the pair | 56 c - 75 h =   | 1.3594 |
| shared electron number for the pair | 56 c - 109 h =  | 0.0341 |
| shared electron number for the pair | 56 c - 110 h =  | 0.0250 |
| shared electron number for the pair | 57 h - 58 c =   | 0.0184 |
| shared electron number for the pair | 58 c - 59 c =   | 1.3457 |
| shared electron number for the pair | 58 c - 76 h =   | 1.3740 |
| shared electron number for the pair | 58 c - 77 h =   | 1.3752 |
| shared electron number for the pair | 58 c - 78 h =   | 0.0281 |
| shared electron number for the pair | 58 c - 79 h =   | 0.0224 |
| shared electron number for the pair | 59 c - 60 h =   | 0.0194 |
| shared electron number for the pair | 59 c - 61 h =   | 0.0222 |
| shared electron number for the pair | 59 c - 76 h =   | 0.0282 |
| shared electron number for the pair | 59 c - 77 h =   | 0.0230 |
| shared electron number for the pair | 59 c - 78 h =   | 1.3782 |
| shared electron number for the pair | 59 c - 79 h =   | 1.3760 |
| shared electron number for the pair | 60 h - 61 h =   | 0.0182 |
| shared electron number for the pair | 62 c - 80 h =   | 1.3724 |
| shared electron number for the pair | 62 c - 81 h =   | 1.3935 |
| shared electron number for the pair | 62 c - 82 h =   | 1.3911 |
| shared electron number for the pair | 63 c - 83 h =   | 1.3822 |
| shared electron number for the pair | 63 c - 84 h =   | 1.3867 |
| shared electron number for the pair | 63 c - 85 h =   | 1.3959 |
| shared electron number for the pair | 64 c - 86 h =   | 1.3888 |
| shared electron number for the pair | 64 c - 87 h =   | 1.3936 |
| shared electron number for the pair | 64 c - 88 h =   | 1.3773 |
| shared electron number for the pair | 65 c - 89 h =   | 1.3906 |

|                                     |                |        |
|-------------------------------------|----------------|--------|
| shared electron number for the pair | 65 c - 90 h =  | 1.3957 |
| shared electron number for the pair | 65 c - 91 h =  | 1.3712 |
| shared electron number for the pair | 66 c - 92 h =  | 1.3727 |
| shared electron number for the pair | 66 c - 93 h =  | 1.3912 |
| shared electron number for the pair | 66 c - 94 h =  | 1.3938 |
| shared electron number for the pair | 67 c - 95 h =  | 1.3910 |
| shared electron number for the pair | 67 c - 96 h =  | 1.3954 |
| shared electron number for the pair | 67 c - 97 h =  | 1.3715 |
| shared electron number for the pair | 68 c - 98 h =  | 1.3966 |
| shared electron number for the pair | 68 c - 99 h =  | 1.3832 |
| shared electron number for the pair | 68 c - 100 h = | 1.3748 |
| shared electron number for the pair | 69 c - 101 h = | 1.3775 |
| shared electron number for the pair | 69 c - 102 h = | 1.3753 |
| shared electron number for the pair | 69 c - 103 h = | 1.3960 |
| shared electron number for the pair | 70 c - 104 h = | 1.3921 |
| shared electron number for the pair | 70 c - 105 h = | 1.3967 |
| shared electron number for the pair | 70 c - 106 h = | 1.3710 |
| shared electron number for the pair | 71 h - 72 c =  | 0.0184 |
| shared electron number for the pair | 72 c - 73 c =  | 1.3456 |
| shared electron number for the pair | 72 c - 107 h = | 1.3740 |
| shared electron number for the pair | 72 c - 108 h = | 1.3752 |
| shared electron number for the pair | 72 c - 109 h = | 0.0281 |
| shared electron number for the pair | 72 c - 110 h = | 0.0224 |
| shared electron number for the pair | 73 c - 74 h =  | 0.0194 |
| shared electron number for the pair | 73 c - 75 h =  | 0.0222 |
| shared electron number for the pair | 73 c - 107 h = | 0.0282 |
| shared electron number for the pair | 73 c - 108 h = | 0.0230 |
| shared electron number for the pair | 73 c - 109 h = | 1.3781 |
| shared electron number for the pair | 73 c - 110 h = | 1.3760 |
| shared electron number for the pair | 74 h - 75 h =  | 0.0182 |
| shared electron number for the pair | 76 h - 77 h =  | 0.0231 |
| shared electron number for the pair | 78 h - 79 h =  | 0.0227 |
| shared electron number for the pair | 80 h - 81 h =  | 0.0231 |
| shared electron number for the pair | 80 h - 82 h =  | 0.0230 |
| shared electron number for the pair | 81 h - 82 h =  | 0.0232 |
| shared electron number for the pair | 83 h - 84 h =  | 0.0231 |
| shared electron number for the pair | 83 h - 85 h =  | 0.0224 |
| shared electron number for the pair | 84 h - 85 h =  | 0.0238 |
| shared electron number for the pair | 86 h - 87 h =  | 0.0235 |
| shared electron number for the pair | 86 h - 88 h =  | 0.0229 |
| shared electron number for the pair | 87 h - 88 h =  | 0.0231 |
| shared electron number for the pair | 89 h - 90 h =  | 0.0228 |
| shared electron number for the pair | 89 h - 91 h =  | 0.0228 |
| shared electron number for the pair | 90 h - 91 h =  | 0.0230 |
| shared electron number for the pair | 92 h - 93 h =  | 0.0230 |
| shared electron number for the pair | 92 h - 94 h =  | 0.0231 |
| shared electron number for the pair | 93 h - 94 h =  | 0.0234 |
| shared electron number for the pair | 95 h - 96 h =  | 0.0234 |

|                                     |                 |        |
|-------------------------------------|-----------------|--------|
| shared electron number for the pair | 95 h - 97 h =   | 0.0232 |
| shared electron number for the pair | 96 h - 97 h =   | 0.0230 |
| shared electron number for the pair | 98 h - 99 h =   | 0.0228 |
| shared electron number for the pair | 98 h - 100 h =  | 0.0229 |
| shared electron number for the pair | 99 h - 100 h =  | 0.0231 |
| shared electron number for the pair | 101 h - 102 h = | 0.0229 |
| shared electron number for the pair | 101 h - 103 h = | 0.0231 |
| shared electron number for the pair | 102 h - 103 h = | 0.0235 |
| shared electron number for the pair | 104 h - 105 h = | 0.0234 |
| shared electron number for the pair | 104 h - 106 h = | 0.0230 |
| shared electron number for the pair | 105 h - 106 h = | 0.0230 |
| shared electron number for the pair | 107 h - 108 h = | 0.0231 |
| shared electron number for the pair | 109 h - 110 h = | 0.0227 |
